1  
2  
3 **Role of the exercise professional in bariatric surgery:**  
4 **A multimethod analysis for evidence-based recommendations**  
5

6  
7 [PREPRINT – This manuscript has not been peer reviewed yet.]  
8  
9

10 Matthew A. Stults-Kolehmainen, Ph.D. <sup>a, b, \*</sup>, Dale S. Bond, Ph.D. <sup>c</sup>, Laura A. Richardson, Ph.D. <sup>d</sup>,  
11 Louisa Y. Herring, Ph.D. <sup>e, f</sup>, Bethany Mulone, R.N., B.S.N., M.S.H.A. <sup>a</sup>, Carol Ewing Garber, Ph.D.  
12 <sup>b</sup>, John Morton, M.D. <sup>g</sup>, Saber Ghiassi, M.D. <sup>g</sup>, Andrew J. Duffy, M.D. <sup>g</sup>, Ethan Balk, Ph.D., R.D. <sup>a,</sup>  
13 <sup>h</sup>, Charles J. Abolt, Ph.D. <sup>i</sup>, Matt C. Howard, Ph.D. <sup>j</sup>, Garrett I. Ash, Ph.D. <sup>k, l</sup>, Susannah Williamson,  
14 Ph.D. <sup>m, n</sup>, Emilian Rejane Marcon, Ph.D. <sup>o</sup>, Melissa De Los Santos, M.S., R.D. <sup>b</sup>, Samantha Bond,  
15 M.S. <sup>p</sup>, Janet Huehls, M.S. <sup>q</sup>, Osama Alowaish, M.S. <sup>b</sup>, Nina Brojan Heyman, M.S. <sup>b</sup>, and Bruno  
16 Gualano, Ph.D. <sup>r</sup>

17  
18 <sup>a</sup> Center for Weight Management, Division of Digestive Health, Yale New Haven Hospital, New  
19 Haven, CT, United States

20 <sup>b</sup> Department of Biobehavioral Sciences, Teachers College – Columbia University, New York,  
21 NY, United States

22 <sup>c</sup> Departments of Surgery and Research, Hartford Hospital/HealthCare, Hartford, CT, United  
23 States

24 <sup>d</sup> School of Kinesiology, University of Michigan, Ann Arbor, MI, United States

25 <sup>e</sup> University Hospitals of Leicester NHS Trust, Infirmary Square, Leicester, England, United  
26 Kingdom

27 <sup>f</sup> NIHR Leicester Biomedical Research Centre, Leicester Diabetes Centre, Leicester General  
28 Hospital, Leicester, England, United Kingdom

29 <sup>g</sup> Division of Bariatric and Minimally Invasive Surgery, Department of Surgery, Yale University  
30 School of Medicine, New Haven, CT, United States

31 <sup>h</sup> Department of Nutrition and Food Studies, New York University, New York, NY, United States

32 <sup>i</sup> Earth and Environmental Sciences Division, Los Alamos National Laboratory, Los Alamos, NM,  
33 United States

34 <sup>j</sup> Department of Marketing & Quantitative Methods, University of South Alabama, Mobile, AL,  
35 United States

36 <sup>k</sup> Center for Medical Informatics, Yale School of Medicine, New Haven, CT, United States

37 <sup>l</sup> Center for Pain, Research, Informatics, Medical Comorbidities and Education Center (PRIME),  
38 VA Connecticut Healthcare System, West Haven, CT, United States

39 <sup>m</sup> Center for Military Psychiatry and Neuroscience, Walter Reed Army Institute of Research  
40 (WRAIR), Silver Spring, MD, United States

41 <sup>n</sup> Army Educational Outreach Program, Rochester Institute of Technology, United States

42 <sup>o</sup> Department of Bariatric Surgery, Hospital de Clínicas de Porto Alegre, Porto Alegre, Brazil

43 <sup>p</sup> College of Applied Health Sciences, University of Illinois at Chicago, Chicago, IL, United States

44 <sup>q</sup> UMass Memorial Weight Center, UMASS Memorial Medical Center, Worcester, MA, United  
45 States

46 <sup>r</sup> Applied Physiology & Nutrition Research Group, School of Medicine, University of São Paulo,  
47 São Paulo, Brazil  
48

49 **Running head:** Exercise professional in bariatric surgery

50

51 \***Correspondence:** Matthew A. Stults-Kolehmainen, Ph.D., Division of Digestive Health, Yale  
52 New Haven Hospital, 8 Divine Street, North Haven, CT, United States. 06473. E-mail address:  
53 [matthew.stults@ynhh.org](mailto:matthew.stults@ynhh.org)

54

55

## 56 **ABSTRACT**

57

58 **Background:** Physical activity (PA) is important for the long-term health and weight management  
59 of patients who undergo metabolic and bariatric surgery (MBS). However, the roles of exercise  
60 professionals in clinical MBS settings have not been systematically determined.

61

62 **Objectives:** To investigate: (1) who are the professionals implementing PA programming in MBS  
63 clinical settings; and (2) what patient-centric tasks do they perform?

64

65 **Setting:** Clinical and academic exercise settings worldwide.

66

67 **Methods:** This is a multimethod study. A systematic literature review of all bariatric PA programs  
68 was conducted. Data about job tasks were extracted, reduced and provided to a panel of 10  
69 experts to sort into categories. Cluster analysis was utilized to find the hierarchical structure of  
70 tasks. A Delphi process was used to agree on a final model, and then the literature was recoded  
71 for higher order job task categories.

72

73 **Results:** The majority of PA professionals were exercise physiologists in the USA and  
74 physiotherapists or other types of exercise professionals elsewhere. Forty-three tasks were  
75 identified, the most reported being: supervision of exercise, fitness testing, and exercise  
76 prescription. Higher-order categories were: (1) Exercise-related health assessment, (2) Body  
77 composition and physical fitness assessment, (3) Lifestyle physical activity and sedentary  
78 behavior assessment, (4) Education, instruction, and prescription, (5) Exercise monitoring, (6)  
79 Behavioral counseling and psychosocial support, and (7) Dietary support. The most common  
80 skills reported in the literature were: supervision of exercise, fitness testing, exercise prescription,  
81 heart rate monitoring, and physical activity counseling. The following statements were rated an  
82 average of 9.0, signifying “imperative” was indicated by all respondents: 1) “Pre- and post-  
83 operative PA/exercise guidelines for bariatric surgery patients are needed”, 2) “Bariatric surgery  
84 programs need to include PA/exercise as part of multidisciplinary care”.

85

86 **Conclusions:** Our expert group of bariatric exercise professionals, allied clinicians, and scientists  
87 reached a consensus on 7 major classifications of job tasks for the exercise professional. It is  
88 important for governing medical associations across the world to formally recognize experienced  
89 exercise professionals as playing pivotal roles in continuing, multidisciplinary care for bariatric  
90 surgery patients. These findings provide evidence-based guidance on how to solidify these  
91 positions within the greater context of healthcare.

92

93 **Keywords:** Bariatric surgery, physical activity, implementation, exercise prescription, mixed  
94 methods, qualitative

95

96

97 **Highlights**

98

99

1. Most exercise professionals in MBS settings are exercise physiologists.

100

2. Results identified 43 patient-centered tasks, which divided into 7 major categories.

101

3. The most common tasks were exercise prescription, supervision, and fitness testing.

102

4. Tasks performed varied marginally by the type of exercise professional.

103

5. Including exercise in MBS patient care was deemed “imperative” by the Expert Group.

104

105 **Introduction**

106  
107 Bariatric surgery yields profound weight loss and health improvements, although there is  
108 substantial variability in the amount and trajectories of these outcomes (1). Some of this variability  
109 may be attributed to bariatric patients' physical activity behaviors. More moderate-to-vigorous  
110 intensity PA, less sedentary behavior, and more steps are associated with greater weight loss,  
111 better weight maintenance, better bone health, and improvements in cardiometabolic health  
112 parameters (2-5). However, patients overall do not become spontaneously active after surgery.  
113 Indeed, an average patient is insufficiently active before surgery and makes only small changes  
114 in activity behaviors after surgery, thus remaining insufficiently active (6). In the absence of  
115 exercise, several important benefits of bariatric surgery are reversed, even in a short period of  
116 time, as has been demonstrated in a recent trial (7-9).

117  
118 The difficulties that patients experience in making substantial changes in their activity behaviors  
119 suggest that they need additional intervention and support to make such changes. Indeed,  
120 structured exercise and physical activity programming in combination with dietary counseling may  
121 help to optimize and sustain bariatric surgery outcomes (5, 10, 11). Unfortunately, not only are  
122 such programs rarely provided in real-world, clinical settings, providers and health services  
123 worldwide do not routinely provide simple exercise guidance (12). This may partly be because no  
124 established guidelines currently exist for exercise after bariatric surgery. Furthermore, effectively  
125 translating exercise programs from clinical trials into clinical practice is difficult to achieve (3, 13-  
126 15). Despite these shortcomings, insurance companies often require the provision of exercise  
127 counselling as a condition for surgical approval (16).

128  
129 In the effort to translate physical activity research into clinical practice, Koorts and colleagues (17)  
130 developed the PRACTIS Model. According to this framework, several major considerations must  
131 be initially targeted, including the clinical population, context/place, intervention characteristics  
132 and the people conducting the implementation – the interventionist. While the first parts have  
133 been widely discussed in the literature, the last component has been infrequently addressed  
134 across the medical literature (15, 18-20). Key questions surrounding exercise personnel include:  
135 a) who delivers the intervention, b) what skills, education, and qualifications should they hold, and  
136 c) how are they trained and supported? While this critical component of the PRACTIS Model has  
137 been addressed in primary care (20-22), it has not received adequate attention in the context of  
138 bariatric surgery. Typically, this is not the physician or surgeon, who usually lacks the time and  
139 training (23), but it may include an exercise professional (EP) working as part of a multidisciplinary  
140 team (24).

141  
142 Exercise professionals comprise a large and diverse group of individuals all aiming to improve  
143 health of patients through physical activity (25). Unfortunately, only recently have guidelines been  
144 established to report this information in the scholarly literature (26), and researchers are just  
145 beginning to conform to this initiative (27). To fill these important knowledge gaps, the major  
146 objective of the current study was to utilize a rigorous multimethod approach (131), including a  
147 systematic and scoping review and thematic analysis, to ascertain the prominent clinical exercise  
148 job tasks conducted by EPs in a bariatric setting. Secondly, we also evaluated if skills of the  
149 exercise professional varied by field (e.g., exercise physiologists vs physiotherapists). In this  
150 effort, we also aimed to describe: a) components of exercise and physical activity programs  
151 reported in the literature, and b) qualifications, training, and background of the professionals who  
152 are delivering the interventions.

153  
154  
155

156 **Methods**

157 To appropriately address the research questions, we utilized a blend of qualitative and  
158 quantitative methods – The Systematic Clinical/Organizational Role Evaluation (SCORE)  
159 technique, which integrates the: AGREE model (28), Content Analysis (29), Card sort (Q) analysis  
160 (30), Hierarchical cluster analysis (31), and the Delphi process (32). The AGREE Model for clinical  
161 decision making, which has been used for other exercise clinical decisions, like the Physical  
162 Activity Readiness-Questionnaire (PAR-Q) (33), was modified for the current task. See Figure 1.  
163

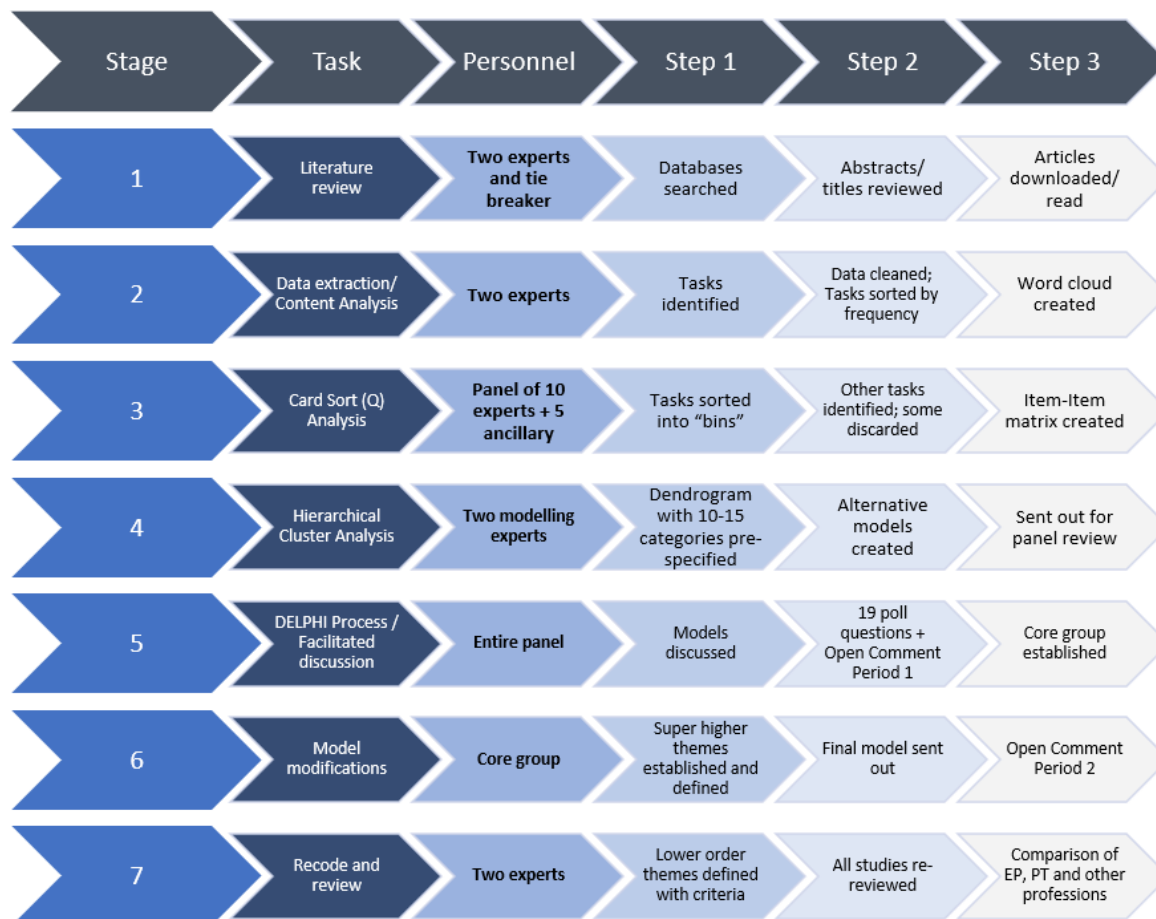

164  
165 Figure 1. Systematic Clinical/Organizational Role Evaluation (SCORE) technique used in the  
166 current study

167  
168

169 Literature review

170 Per the AGREE model (28), we started with a scoping review of the literature (Stage 1) that took  
171 place between June, 2021 and January, 2022 in the Web of Science (Core Collection) and  
172 PubMed databases. PRISMA guidelines were followed (34). Titles and abstracts were searched,  
173 with the first term being “bariatric” and the second term being “exercise” or “physical activity”.  
174 Database results were filtered by language (English and Portuguese only), use of human subjects  
175 and studies publishing original data (e.g., eliminating comments, reviews, guidelines, editorials).  
176 Duplicate studies were then eliminated. During screening of titles and abstracts, studies were  
177 required to describe exercise and physical activity training and/or education programs (e.g., not  
178 just observe participants’ PA over time). Refer to Figure 2. Some articles were obtained by  
179 scanning: a) review papers, b) personal archives and c) reference lists from all studies obtained,  
180 and d) Google Scholar alerts for “Bariatric” and “exercise”. Full text articles were obtained and  
181 read for eligibility.

182  
183

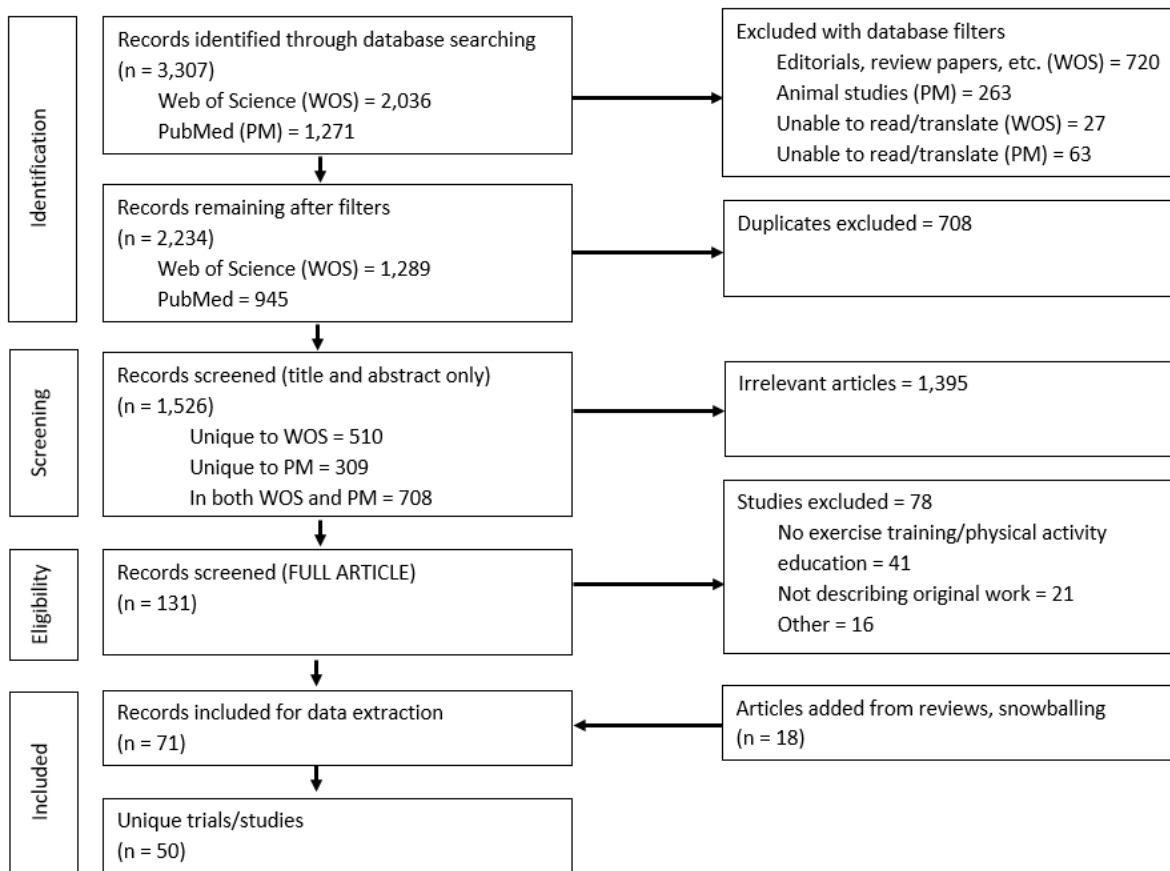

184

185 Figure 2. Prisma CONSORT diagram demonstrating the literature search.

186

187



188 Data extraction

189 Two investigators (MSK and MD) performed the data extraction (Stage 2), which first proceeded  
190 for information related to the “who” of the exercise program (i.e., type of exercise professional  
191 who delivered physical activity programming). Any information regarding education, clinical  
192 training, credentialing, and affiliation of the exercise professional was also noted. Gathering this  
193 type of data presents some difficulty, because: a. most research articles do not directly state what  
194 provider/person completed each aspect of the study, b. authorship lists on most studies represent  
195 individuals from diverse academic backgrounds, c. not all study personnel are acknowledged, d.  
196 the term used to describe exercise professionals varies across geographical regions, such as:  
197 exercise physiologist, physical therapist, exercise specialist, trainer, health educator, etc., and e.  
198 missing information due to journal space constraints. Consequently, for studies going back to  
199 2010, the corresponding author in each study’s byline was emailed by the first author with follow  
200 up questions.

201  
202 These same investigators then extracted data related to patient-centered (clinical) exercise and  
203 physical activity program tasks completed by the exercise professional. To accomplish this, we  
204 decided to use a more inductive approach – relying on the bariatric exercise literature itself and  
205 not depending, a priori, on definitions of job tasks as stated by documents from various  
206 professional organizations about the role of exercise practitioners (35-38), which may or may not  
207 be applicable, or may be inaccurate or insufficient in this setting. By “clinical” or “patient-centered”,  
208 it is meant that we did not attempt to focus on tasks related to basic science questions (e.g.,  
209 laboratory assays), administration, or other activities not directly related to patient contact.

210  
211 An initial list of job tasks was identified through three means. First, by identifying instances where  
212 the role of the exercise professional were directly stated (usually as preceded by strong action  
213 verbs) (i.e., created the exercise program, screened patients, completed assessments,  
214 supervised/monitored training, provided counseling). Second, in studies conducted entirely by  
215 exercise physiologists, one would presume that all activities were conducted by these exercise  
216 professionals. Third, a corresponding author declared such actions in a personal communication.  
217 Two investigators systematically evaluated and interpreted publications independently to  
218 minimize bias (MSK and MD).

219  
220 Thematic and Card Sort (Q) Analysis

221 In the third stage, these data were categorized with a mixed inductive thematic analysis (25) and  
222 card sort (Q) analysis (30). Data were systematically reduced by MSK and MD, who conducted  
223 cleaning and recoding. This included nominalization of verbs. Data were examined: a) first as  
224 multiple words (e.g., “heart rate monitoring”) and then, b) connected/adjoined with a hyphen (e.g.,  
225 “HR-monitoring”) to facilitate visualization. Tasks were then compared for overlap and agreement  
226 between investigators. Unique job tasks were entered into a free word cloud program  
227 (freewordcloudgenerator.com, Salt Lake City, UT) to visually inspect (black background, rainbow  
228 color pattern font), categorize by word frequency, and provide labels (39). See Figure 3.

229

230  
231

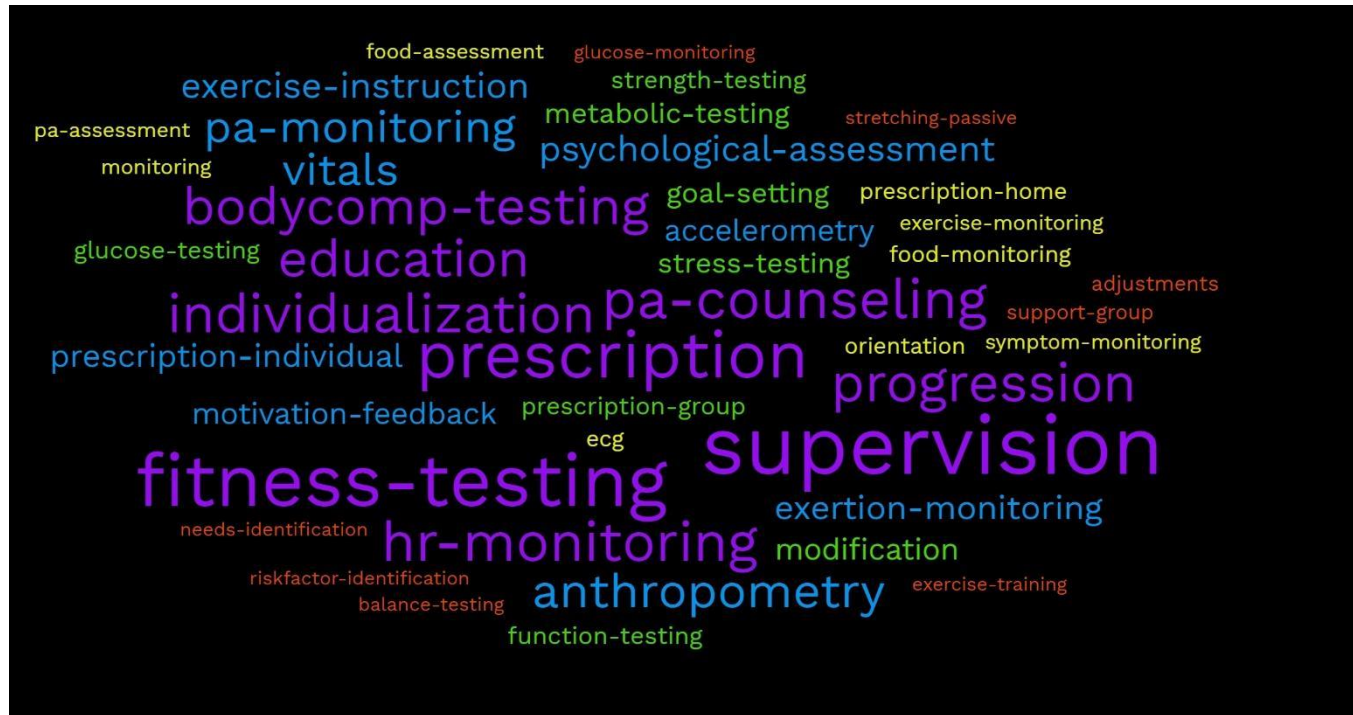

232

233 Figure 3. Word cloud illustrating common exercise job tasks presented to the research team for  
234 the bin sort assignment.

235



236 An expert group consisting of ten bariatric clinicians, exercise practitioners and scientists  
237 (including: four exercise physiologists, two registered dietitians (RDs), one advanced practice  
238 registered nurse, one surgeon, and two exercise scientists), along with 5 observers,  
239 independently inspected the data, identified related tasks and sorted/categorized these into  
240 “bins”/clusters starting with the most frequent job tasks observed. To prevent author word choice  
241 from hiding findings (e.g., “body composition testing” vs. “analysis of body composition”), high  
242 frequency words were collapsed with similar words and then re-analyzed. The initial goal was 10-  
243 15 bins or clusters, based on Hsieh & Shannon (29). Respondents could elect to discard items or  
244 suggest new ones. Responses from these ten experts were included into an Item-by-Item matrix,  
245 which was used to determine *distance* of each item from the others (30).

246

#### 247 Hierarchical Cluster Analysis (HCA)

248 In Stage 4, a hierarchical cluster analysis was then utilized (Matlab v R2022a) (31) to create  
249 Dendrogram models based on distance between word items. Two alternative Dendrogram models  
250 were generated for group consideration. Both lower order and higher order themes were detected  
251 from the dendrograms. To identify higher-order themes (HOTs) (to generate the a priori, 10-15  
252 themes) a *distance threshold* was set to 7. To identify 7 super-higher-order themes (SHOTs), a  
253 distance threshold was set to 9.

254

#### 255 DELPHI Process/ Issues in bariatric exercise survey

256 In Stage 5, a process of reaching consensus among the expert group and observers was initiated  
257 to determine a final list of job task categories and to address related issues, based on the Delphi  
258 Technique (32). This included 2 group discussion sessions (both in June, 2022) to: a) review the  
259 HCA, b) consider adding, deleting and/or merging tasks, c) consider ranking and ordering items,  
260 etc. Then a survey with 19 open and closed questions (in 4 sections) was sent to all respondents.  
261 Section 4 included 4 questions about issues in bariatric exercise - rated on a 0 (no importance)  
262 to 9 (imperative) scale. Another two weeks were permitted to respond. “Consensus” was defined  
263 by > 80% agreement for the first 3 sections of questions and inter-quartile range ( $\leq 2$ ) for section  
264 4. As part of this process, voting permitted a Core Group (MSK, DB, LR and LH) to later make  
265 minor clarifications to the model (Stage 6). A final model was presented to the entire panel, with  
266 an additional open comment period of two weeks ensuring representation of emerged categories.

267

268 In Stage 7, four authors (MSK, MD, OA, LR) established specific criteria to define each HOT (25),  
269 as seen in Supplemental Table 1. These criteria defined what explicitly and implicitly constituted  
270 each higher-order category, what explicitly was *not* part of each category. A new form/template  
271 was then created to re-screen the searchable pdf of all manuscripts for tasks and their properties  
272 (e.g., program delivery mode: in-person, home line; format: 1-on-1, group) in each category. The  
273 re-review and recode using these forms were completed by two authors (MSK, OA). In some  
274 cases, emails were sent to corresponding authors for clarification on study details.

275

## 276 RESULTS

277 A total of 63 studies were found describing exercise programs in bariatric surgery, representing  
278 50 unique interventions (many studies had more than one published report). A further search to  
279 include all articles related to these interventions increased the total to 71 (7, 8, 10, 16, 27, 40-  
280 105) with 57% published after 2015. Over half of the studies were from just two countries – the  
281 USA (39%) and Brazil (14%). Exercise programs were mainly conducted in teaching hospitals  
282 (38%). The exercise professional delivering the PA programming was firstly an exercise  
283 physiologist in the USA (28%; person with graduate degree in EP and /or certification) and a  
284 physiotherapist in the rest of the world (43%). A number of other exercise professionals (e.g.,  
285 physical educators, coaches, personal trainers) were also involved. The majority of articles were  
286 “proof of concept” (i.e., addressing the question of whether exercise is beneficial for weight loss)  
287 as opposed to implementation. The main component of these programs was supervised exercise  
288 training (65%). Later article additions increased this total to 83 (106-117), which were analyzed  
289 later. See Tables 1A and 1B.

290

### 291 Data extraction

292 Data extraction resulted in 385 tasks across all studies, 43 of which were unique. The 5 most  
293 common tasks were: real-time supervision of exercise (36 studies), fitness testing (31), [exercise]  
294 prescription (27), heart rate monitoring (21), and physical activity counseling (21). Less commonly  
295 described in the literature were: exercise prescription for home, exercise behavioral counseling,  
296 and metabolic testing.

297

### 298 Content analysis / Card sort

299 Respondents sorted tasks into an average of 11.8 bins, each bin had an average of 3.6 items,  
300 and there was an average of 1.8 items deleted per respondent. Respondents suggested 34 items  
301 to add (3.4/respondent). Unique items were considered in later rounds. See Table 2.

302

303 A heat map of the associations of the original 43 exercise professional job tasks is provided in  
304 Figure 4. The items with the strongest association (9 out of 10 raters agreed) were strength  
305 testing and physical function testing. Eight out of 10 raters indicated that the following 3 tasks  
306 were paired: strength testing/balance testing, fitness testing/function testing, prescription for  
307 home/ prescription-individual. Seven raters agreed on 5 pairs, 6 raters - 10 pairs, 5 raters -17  
308 pairs, etc.

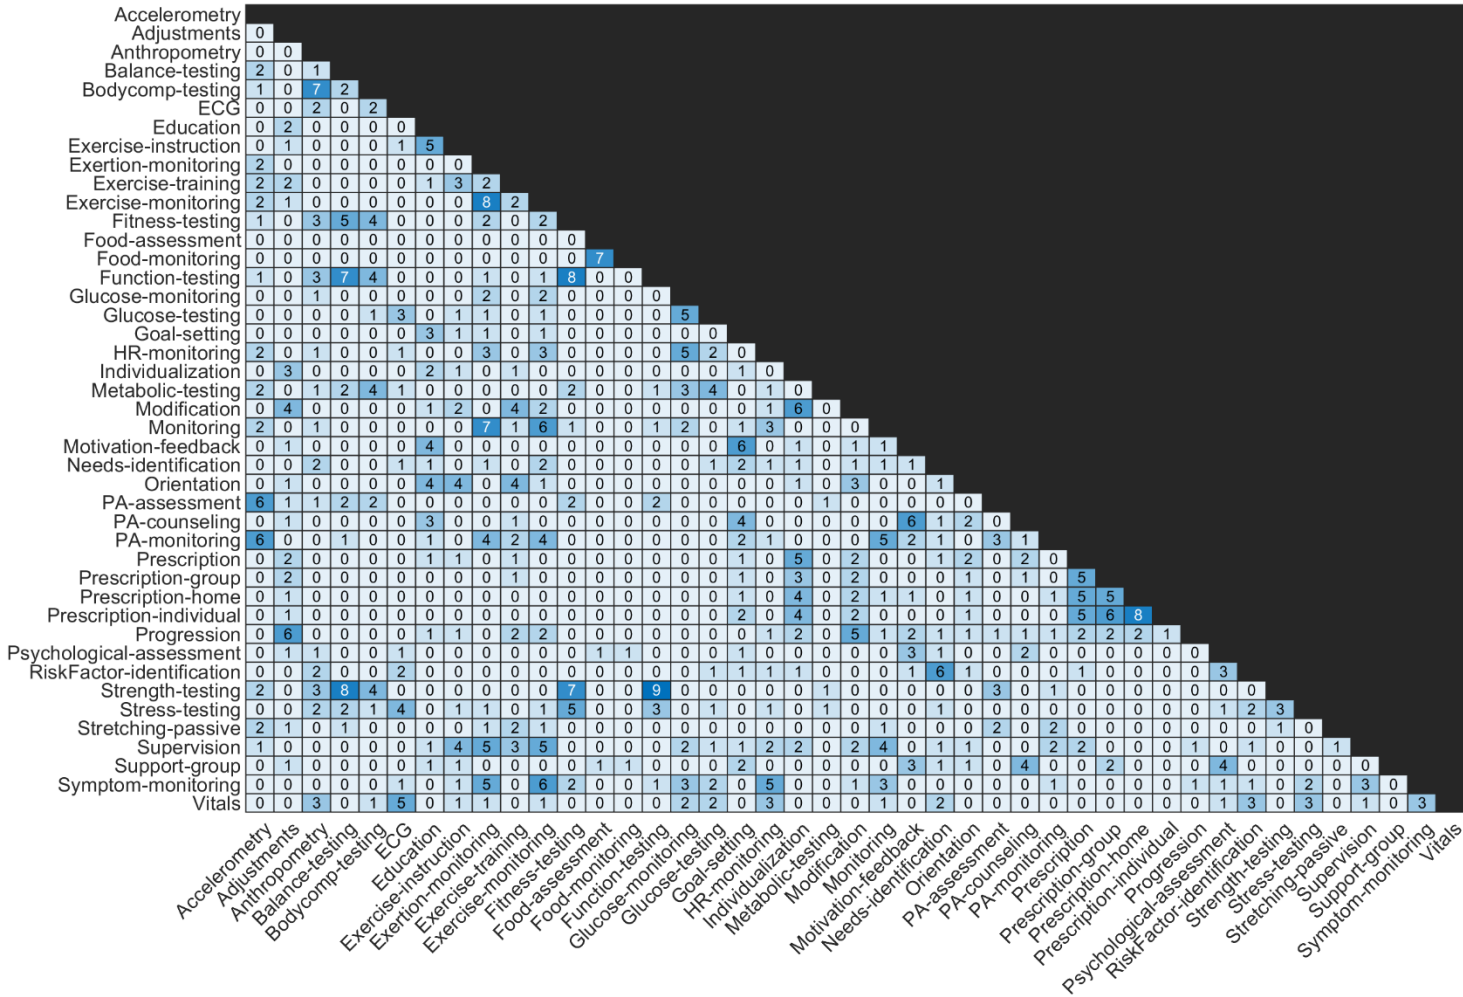

342  
343 Figure 4. Heat map demonstrating task associations within sorting bins.  
344

345 The hierarchical cluster analysis based on this matrix generated two models, which are shown in  
346 Figure 5. Model A had a better fit index than Model B, as quantified by the cophenetic correlation  
347 coefficient ( $c = 0.85$  and  $0.50$ , respectively), a common statistic that measures the faithfulness  
348 with which the similarities between individual items in the original matrix were represented visually  
349 in the final dendrogram.  
350

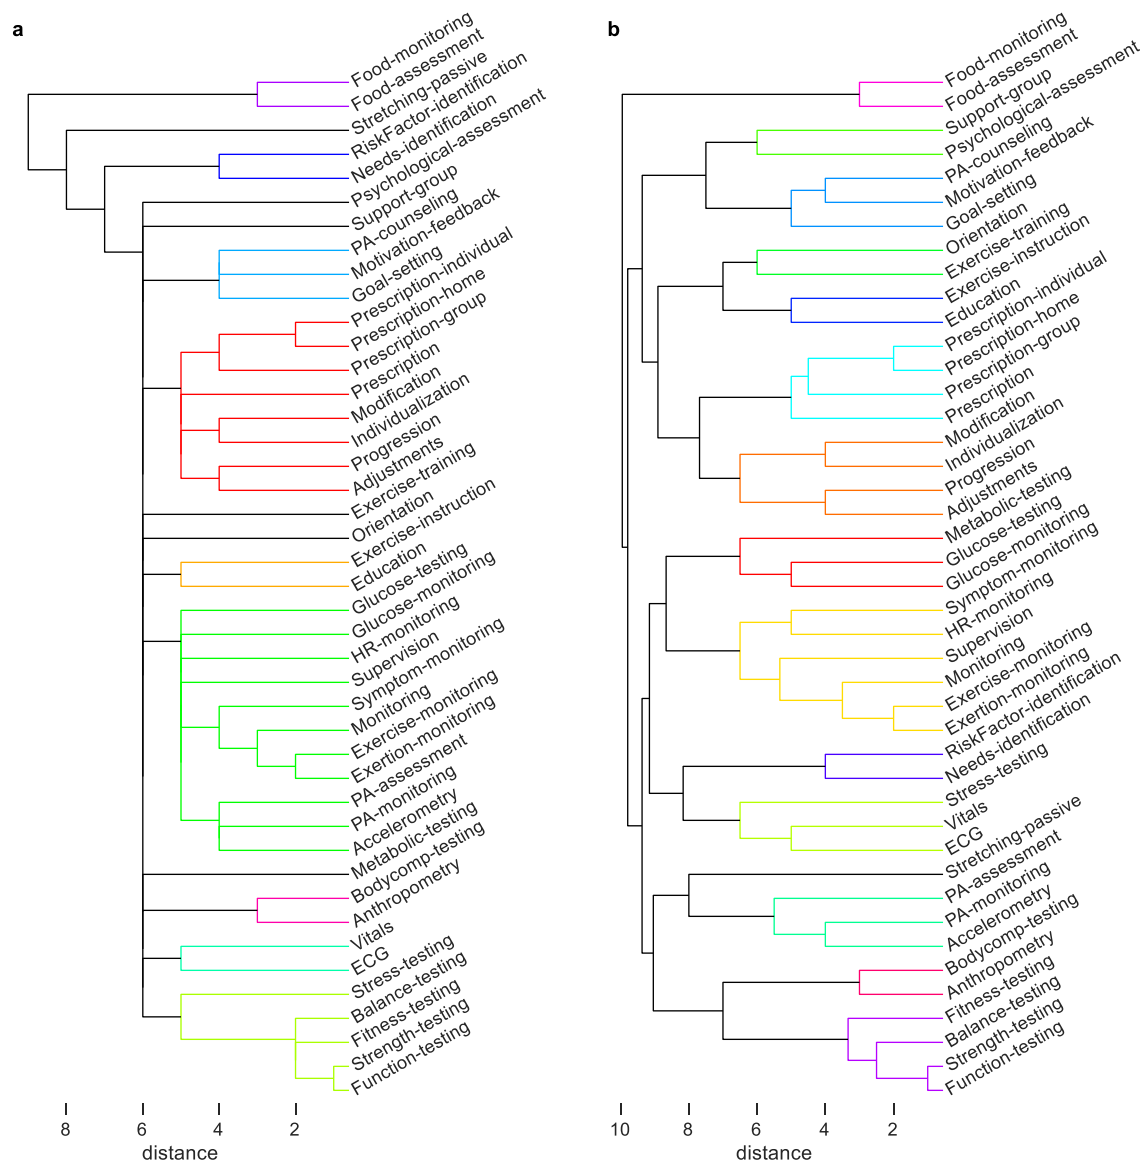

351  
352  
353  
354 Figure 5. Alternative models (A and B) generated by the hierarchical cluster analysis considered  
355 in the Delphi process.  
356  
357  
358  
359

360 Delphi process / Core Group

361 Respondents approved Model B. They indicated that “Passive stretching” should be eliminated  
362 and “exercise prescription adherence” should be included. The Core Group eliminated the general  
363 “prescription” task. Therefore, the final model included 42 patient-centered exercise tasks (i.e.,  
364 lower order themes), which divided into 14 higher order themes and 7 SHOTs. The final SHOTs  
365 were: (1) Exercise-related health assessment, (2) Body composition and physical fitness  
366 assessment, (3) Lifestyle physical activity and sedentary behavior assessment, (4) Education,  
367 instruction, and prescription, (5) Exercise monitoring, (6) Behavioral counseling and psychosocial  
368 support, (7) Dietary support. The final model passed with a unanimous final vote. See Figures 6-  
369 8 and Table 3 for the final model, with descriptions of the SHOTs. Task categories were not  
370 ranked, per group consensus, but were further sorted by temporal precedence in a clinical setting  
371 (starting with basic assessments).

372

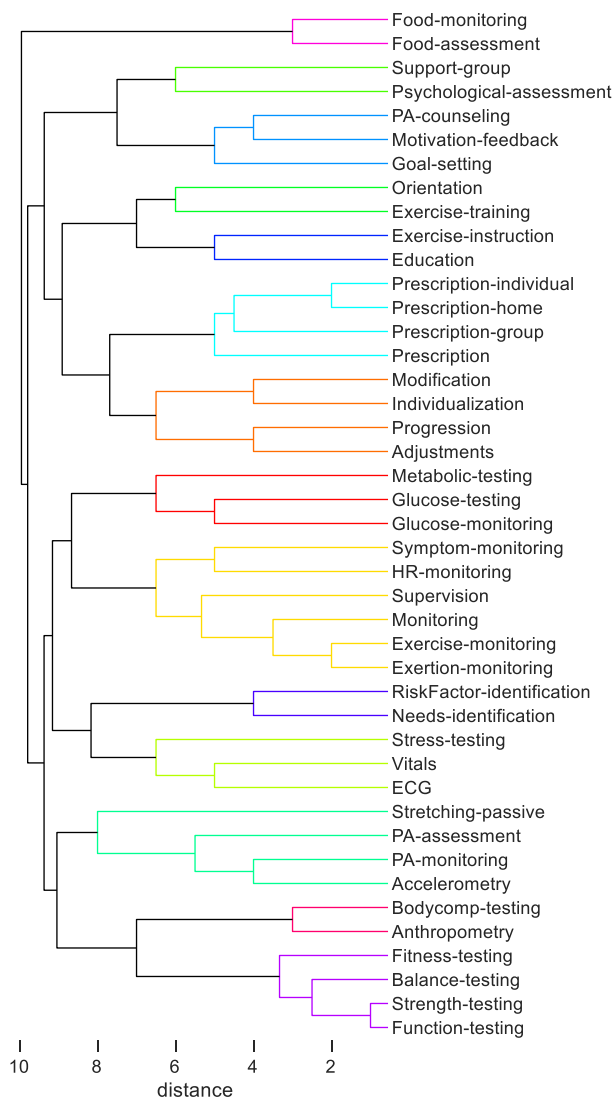

373  
374 Figure 6. Final hierarchical cluster analysis model

375

376

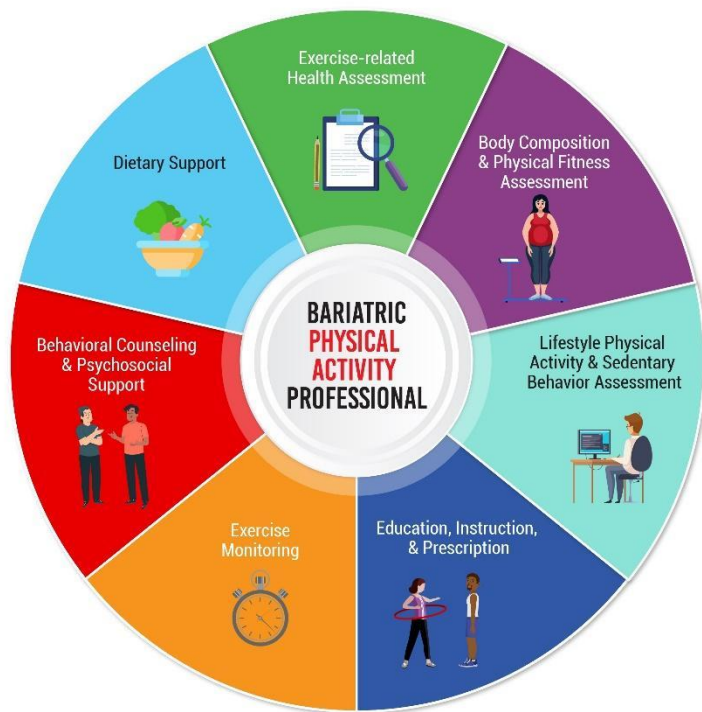

377

378

379

380 Figure 7. Illustrated final model (Version A) for clinical use.

381



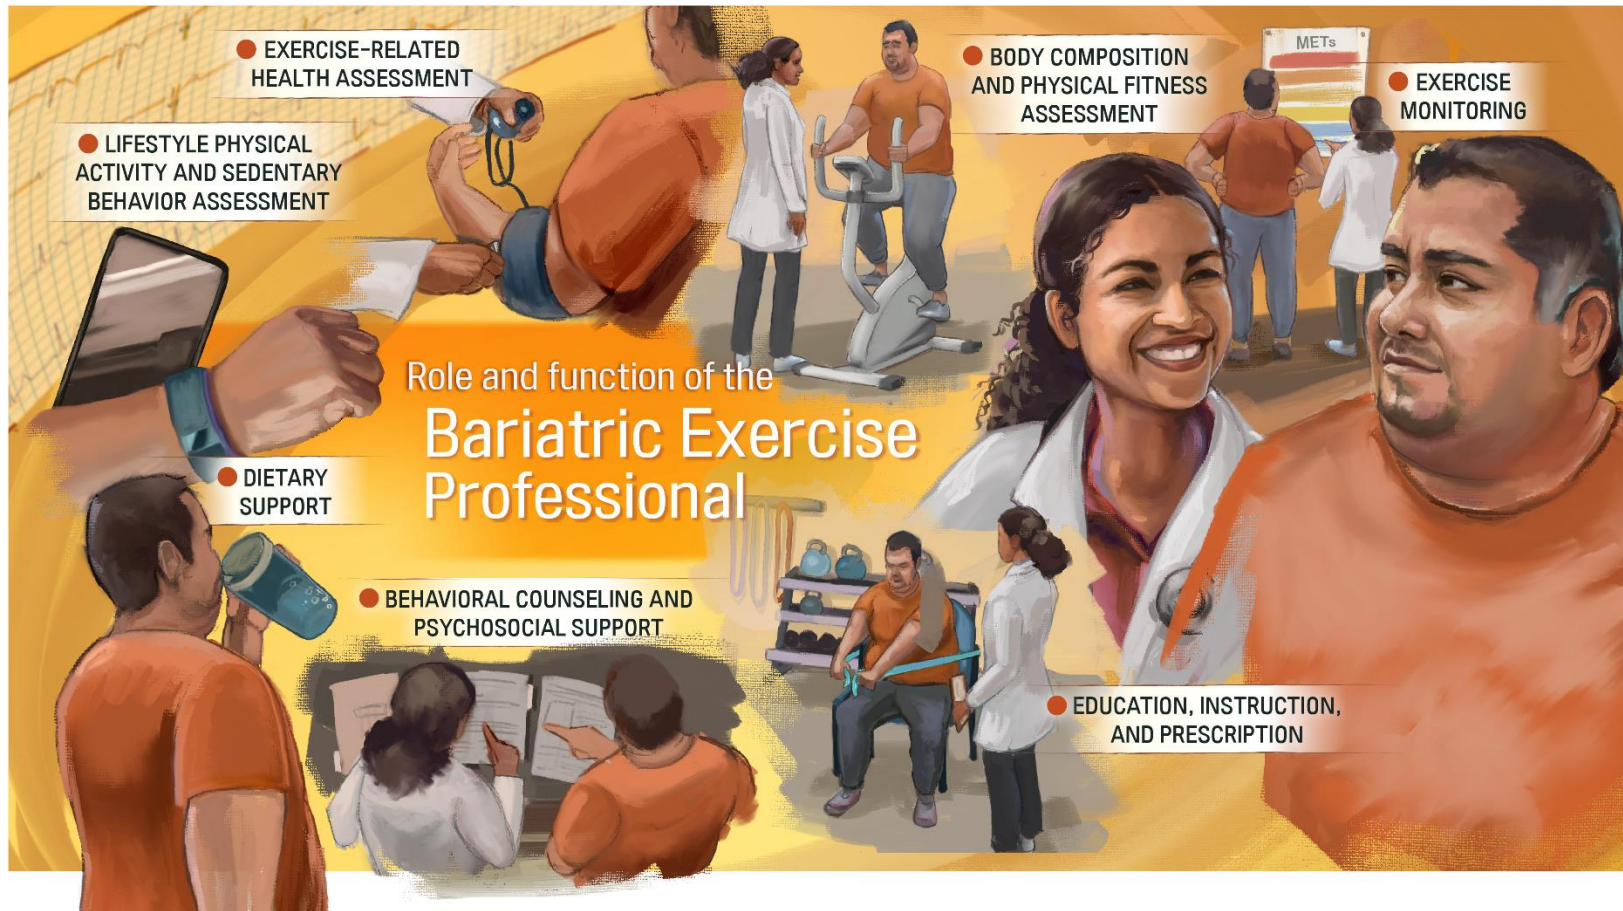

382

383 Figure 8. Illustrated final model (Version B) for clinical use

384

385

386

### 387 Issues in Bariatric Exercise Survey

388 The following statements were rated an average of 9.0, indicating “imperative” was rated by all  
389 10 respondents: 1) “Pre- and post-operative PA/exercise guidelines for bariatric surgery patients  
390 are needed”, 2) “Bariatric surgery programs need to include PA/exercise as part of  
391 multidisciplinary care”. The following questions were rated by USA respondents, also receiving  
392 unanimous agreement that they are “imperative”: 1) Bariatric surgery patients should receive  
393 customized and individualized PA/exercise guidance from credentialed exercise professionals  
394 with expertise in PA prescription and intervention, 2) Exercise services in bariatric surgery settings  
395 should be standardized and reimbursed.

396

### 397 Re-review

398 The higher order tasks most represented in the literature were “Real-time monitoring, instruction  
399 and feedback” at 73%. The task HOT least represented was “stress testing” at 34%. In the  
400 review of differences in tasks performed by profession, two higher-order task categories (HOTs)  
401 were different. Exercise physiologists were determined to perform both Psychosocial support  
402 (HOT 13) and Dietary support (HOT 14) to a greater degree. See Supplemental Tables 2a and  
403 2b.

404

405

## 406 **DISCUSSION**

407

408 Increased PA is essential for the long-term success of bariatric patients and helps to maintain  
409 health improvements even in the short-to-medium term (5, 7-10). However, many patients do not  
410 become active after surgery. Supports that could offset this inactivity (e.g., PA prescription,  
411 counseling, supervised exercise programs) are often not provided as part of clinical care. While  
412 there is a clear need for exercise professionals in the multidisciplinary care of bariatric patients,  
413 the specifics of their professional background and tasks they perform in a bariatric setting are  
414 unclear. To better clarify the roles and rationale for exercise professionals in MBS, we conducted  
415 a unique and rigorous multimethod analysis of all exercise programs peri-bariatric surgery. We  
416 extracted tasks of the exercise professional, submitted these to an expert group of clinicians for  
417 sorting into themes, used a sophisticated analysis to create a hierarchical model of these job  
418 tasks, and further consulted the expert group for their unique perspectives.

419

420 Overall, our study found exercise professionals perform a large set of job tasks related to the  
421 clinical care of the patient. Forty-three identified tasks were classified into 14 higher order themes  
422 and then seven super-higher order themes. These 7 included: (1) Exercise-related health  
423 assessment, (2) Body composition and physical fitness assessment, (3) Lifestyle physical activity  
424 and sedentary behavior assessment, (4) Education, instruction, and prescription, (5) Exercise  
425 monitoring, (6) Behavioral counseling and psychosocial support, and (7) Dietary support. The  
426 most common skills reported in the literature were: supervision of exercise, fitness testing,  
427 exercise prescription, heart rate monitoring, and physical activity counseling. However, the expert  
428 group decided to not rank tasks or their categories by commonality but treat them as relatively  
429 equal in importance to avoid overlooking other key functions of the exercise professional. Tasks  
430 conducted by exercise professionals in bariatric treatment align closely with similar practice in  
431 other clinical settings. For instance, our 7 SHOT categories overlapped considerably with core  
432 components categories from cardiac rehabilitation (e.g., Psychosocial Management, PA  
433 Counseling, Exercise Training Evaluation) (118, 119) and with performance domains from the  
434 American College of Sports Medicine (ACSM) clinical exercise physiology credential (e.g.,  
435 Exercise Testing, Exercise Prescription, Exercise Training and Leadership, Education and  
436 Behavior Change) (36). The expert group noted that some tasks should not be included, such as  
437 post-operative PA clearance (frequently provided by an advanced practice registered nurse

438 [APRN], physician's assistant or surgeon). The group also indicated it might be worthwhile  
439 including other psychosocial support factors as well, including lessening stigmatization, which  
440 may contribute to PA avoidance in bariatric patients (120, 121). Overall, the results indicate that  
441 the exercise professional may have skills and abilities to provide a larger role than that suggested  
442 by Mechanick (122, 123) and others (124), which appear to limit tasks to "lifestyle medicine  
443 evaluation", physical activity counseling, monitoring adherence to PA guidelines and supervising  
444 exercise sessions.

445  
446 How exercise professionals are classified ostensibly varies by country. Research reviewed in this  
447 study, demonstrated the exercise professional was most often an exercise physiologist in the  
448 USA, and a physical therapist outside the USA, the two professions noted by the ASMB  
449 Integrated Health Section (125). It is important to note that in Australia, Canada and the United  
450 Kingdom, like the USA, exercise physiologists work independent of physical therapists (126, 127)  
451 and in some countries, like Singapore, they may work together. In Brazil, the exercise professional  
452 was typically a physical educator. Regardless, our analysis determined that the job tasks exercise  
453 professionals conducted in bariatric surgery differed on only two dimensions (Psychosocial  
454 support, Dietary support). The expert group did not make any specific recommendations  
455 regarding profession, credentialing, or qualifications. Indeed, the experts rated as "imperative"  
456 that bariatric patients should have customized exercise guidance from credentialed exercise  
457 professionals (regardless of whether the professional is an exercise physiologist, physical  
458 therapist, or other qualified professional), and exercise services in the bariatric surgery setting  
459 should be incorporated into the reimbursable services of care.

460  
461 The current study has several notable strengths, the first of which is the broad, robust  
462 methodological approach used address the topic, which provided several levels of confirmative  
463 evidence for the results. Additionally, the expert group included a multidisciplinary team of  
464 exercise researchers, practitioners, scientists, nurses, surgeons, and dietitians from multiple  
465 nations.

466  
467 This investigation had some limitations. We did not conduct a full-scale survey of bariatric exercise  
468 professionals across the world, which should be done as a next step. The expert group was a  
469 convenience sample, with the implication that there is likely some bias in the analysis. Lastly, a  
470 majority of studies provided insufficient reporting of exercise-related tasks. The notable  
471 exceptions of this were from a group in Spain (117, 128) and the USA (108). However, we aimed  
472 to compensate for this by including as many studies as possible on the topic. Furthermore, we  
473 contacted numerous authors of the included publications, and their responses are included in  
474 these data.

475  
476 The results of this study have important clinical implications. First, these models will provide a  
477 clearer understanding of the role the exercise professional in the bariatric surgery setting provides  
478 and the value they bring to a multidisciplinary surgery team, including nurses (125, 129, 130).  
479 More practically, findings provide practical and useful information that could contribute in four  
480 major areas: 1) describing the roles and responsibilities exercise professionals are able to fill,  
481 helping create job descriptions, 2) developing CPT/billing codes for reimbursement (aligning with  
482 how cardiac rehab was developed), helping to spur other funding for positions, 3) credentialing  
483 exercise professionals in bariatric care and development of "core competencies" (119) and 4)  
484 helping to coordinate care of clinical exercise personnel, perhaps in a system of ExerciseCare.  
485 Future needs assessment include: 1) PA guidelines for bariatric patients, perhaps similar to those  
486 from Exercise and Sports Science Australia (3) or those recently established for type 2 diabetes  
487 (131) and 2) better reporting of roles and tasks performed by the exercise professional in surgery,  
488 as outlined by the CERT guidelines (117, 128). Future work should also describe: 1) important



489 knowledge, skills and competencies, and 2) how exercise professionals collaborate as a member  
490 of the multidisciplinary team commonly comprised of nurses, dietitians, psychologists and other  
491 providers. More studies are needed to describe the translation and implementation of bariatric  
492 and medical weight management PA programs for standardization, reproducibility and to  
493 strengthen the case for the role of the exercise professional in bariatric surgery, medical weight  
494 loss, and even the greater realm of healthcare and exercise-care.

495

496

## 497 **CONCLUSION**

498

499 To our knowledge, this is the first study to systematically investigate the role of the exercise  
500 professional in a bariatric surgery setting. Exercise is regarded as an important facet of surgery  
501 multidisciplinary care, but has been poorly implemented, and many programs do not have an  
502 exercise professional within their team. It is also important to note that patients want access to  
503 exercise professionals before and after their surgery (132), underpinning why we completed the  
504 first systematic and multimethod investigation of the exercise professional in bariatric surgery. We  
505 searched for and analyzed every published bariatric exercise program from inception to 2022.  
506 Our expert group of bariatric exercise professionals, allied clinicians, and scientists reached a  
507 consensus on 7 major classifications of job tasks for the exercise professional. Tasks varied  
508 marginally by the title of the exercise professional. Results from our study provide convergent  
509 validity with other exercise professional credentialing bodies. It is important for governing medical  
510 associations across the world to formally recognize experienced exercise professionals as playing  
511 pivotal roles in continuing, multidisciplinary care for bariatric surgery patients. Data from this  
512 rigorous and unique analysis can also provide evidence-based guidance on how to solidify these  
513 positions within the greater context of healthcare.

514

515

## 516 **ACKNOWLEDGEMENTS**

517

518 The authors wish to thank Jessie Moore, R.N., A.P.R.N. (Yale New Haven Hospital), Jennifer  
519 Guan, D.P.T., Edd Taylor, Ph.D. (University of Colorado) and Amanda Divin, Ph.D. (Texas A&M  
520 University - Commerce) for thoughtful critiques and technical assistance. Rebecca Lamberti,  
521 R.N., B.S.N., M.S.N., D.N.P. (Yale New Haven Hospital) and Diana Rivera, R.N., B.S.N.,  
522 C.N.M.L. (Yale New Haven Hospital) provided strategic administrative and logistical support.

523

524

## 525 **COMPETING INTERESTS**

526

527 None

528

529

## 530 **AUTHOR CONTRIBUTIONS**

531

532 The concept was developed by MSK, DB, SG, and BG. MSK, DB, LR and LH formed the Core  
533 Group. The Expert Group and advisory panel consisted of MSK, LR, JH, CEG, MD, EB, BM, AD,  
534 DB, LH, BG, ERM, GA, JM, OA, SW and SG. The literature review was conducted by MSK. Data  
535 extraction was conducted by MSK, MD, OA, and SW. CA conducted the statistical modelling.  
536 Statistical consulting was provided by MH. MSK, DB, BG, LR, and LH wrote the manuscript. SB  
537 created the artwork. OA provided additional illustration support. NBH was the study auditor. All  
538 authors read and critiqued the paper and provided final approval of the manuscript.

539

540 **FUNDING**

541  
542 Bruno Gualano is supported by FAPESP, CNPq and CAPES. LH is supported by the National  
543 Institute for Health and Care Research (NIHR) - Leicester Biomedical Research Centre (BRC).  
544 [The views expressed are those of the author(s) and not necessarily those of the NIHR or the  
545 Department of Health and Social Care.] GA was supported by a fellowship from the Office of  
546 Academic Affiliations at the United States Veterans Health Administration, a Robert E. Leet and  
547 Clara Guthrie Patterson Trust Mentored Research Award, Bank of America, N.A., Trustee, and  
548 American Heart Association Grant #852679 (GA, 2021–2024).

549  
550  
551 **DATA AVAILABILITY STATEMENT**

552  
553 All data produced in the present study are available upon reasonable request to the authors.

554  
555  
556 **REFERENCES**

- 557  
558 1. Grover BT, Morell MC, Kothari SN, Borgert AJ, Kallies KJ, Baker MT. Defining Weight  
559 Loss After Bariatric Surgery: a Call for Standardization. *Obesity Surgery*. 2019;29(11):3493-9.  
560 doi: 10.1007/s11695-019-04022-z
- 561 2. Garber CE. The Health Benefits of Exercise in Overweight and Obese Patients. *Curr*  
562 *Sports Med Rep*. 2019;18(8):287-91. doi: 10.1249/jsr.0000000000000619
- 563 3. Johnson NA, Sultana RN, Brown WJ, Bauman AE, Gill T. Physical activity in the  
564 management of obesity in adults: A position statement from Exercise and Sport Science  
565 Australia. *Journal of Science and Medicine in Sport*. 2021;24(12):1245-54. doi:  
566 <https://doi.org/10.1016/j.jsams.2021.07.009>
- 567 4. Herring LY, Stevinson C, Carter P, Biddle SJH, Bowrey D, Sutton C, et al. The effects of  
568 supervised exercise training 12-24 months after bariatric surgery on physical function and body  
569 composition: a randomised controlled trial. *Int J Obes (Lond)*. 2017;41(6):909-16. doi:  
570 10.1038/ijo.2017.60
- 571 5. Bond DS, Manuel KM, Wu Y, Livingston J, Pappasavas PK, Baillet A, et al. Exercise for  
572 counteracting weight recurrence after bariatric surgery: a systematic review and meta-analysis  
573 of randomized controlled trials. *Surgery for Obesity and Related Diseases*. 2022. doi:  
574 <https://doi.org/10.1016/j.soard.2022.12.029>
- 575 6. Zabatiero J, Smith A, Gucciardi DF, Hamdorf Am JM, Taylor SF, Hill K. Patterns of  
576 Change in Device-Based Physical Activity and Sedentary Time Following Bariatric Surgery: a  
577 Longitudinal Observational Study. *Obesity Surgery*. 2021;31(7):3015-25. doi: 10.1007/s11695-  
578 021-05337-6
- 579 7. Dantas WS, Roschel H, Murai IH, Gil S, Davuluri G, Axelrod CL, et al. Exercise-Induced  
580 Increases in Insulin Sensitivity After Bariatric Surgery Are Mediated By Muscle Extracellular  
581 Matrix Remodeling. *Diabetes*. 2020;69(8):1675-91. doi: 10.2337/db19-1180
- 582 8. Dantas WS, Gil S, Murai IH, Costa-Hong V, Peçanha T, Merege-Filho CAA, et al.  
583 Reversal of Improved Endothelial Function After Bariatric Surgery Is Mitigated by Exercise  
584 Training. *Journal of the American College of Cardiology*. 2018;72(18):2278-9. doi:  
585 10.1016/j.jacc.2018.07.094
- 586 9. Gualano B, Kirwan JP, Roschel H. Exercise Is Key to Sustaining Metabolic Gains After  
587 Bariatric Surgery. *Exerc Sport Sci Rev*. 2021;49(3):197-204. doi:  
588 10.1249/jes.0000000000000253
- 589 10. Herring L, Stevinson C, Carter P, Biddle S, Bowrey D, Sutton C, et al. The effects of  
590 supervised exercise training 12-24 months after bariatric surgery on physical function and body

- 591 composition: a randomised controlled trial. *International Journal of Obesity*. 2017;41:909-16.  
592 doi:
- 593 11. Martin-Fernandez KW, Creel DB, Schuh LM. Psychosocial and behavioral correlates of  
594 weight loss 12 to 15 years after bariatric surgery. *Journal of Behavioral Medicine*.  
595 2022;45(2):252-9. doi: [10.1007/s10865-021-00263-5](https://doi.org/10.1007/s10865-021-00263-5)
- 596 12. Yang K, Zhou Y, Wang M, Shen M, Zhang X, Wang Y. Status of the Field of Bariatric  
597 Surgery: a National Survey of China in 2018. *Obesity Surgery*. 2019;29(6):1911-21. doi:  
598 [10.1007/s11695-019-03792-w](https://doi.org/10.1007/s11695-019-03792-w)
- 599 13. Duijzer G, Haveman-Nies A, Jansen SC, ter Beek J, Hiddink GJ, Feskens EJM.  
600 Feasibility and potential impact of the adapted SLIM diabetes prevention intervention in a Dutch  
601 real-life setting: The SLIMMER pilot study. *Patient Education and Counseling*. 2014;97(1):101-7.  
602 doi: <https://doi.org/10.1016/j.pec.2014.05.024>
- 603 14. Aziz Z, Absetz P, Oldroyd J, Pronk NP, Oldenburg B. A systematic review of real-world  
604 diabetes prevention programs: learnings from the last 15 years. *Implementation Science*.  
605 2015;10(1):172. doi: [10.1186/s13012-015-0354-6](https://doi.org/10.1186/s13012-015-0354-6)
- 606 15. Hansen D, Decroix L, Devos Y, Nocca D, Cornelissen V, Dillemans B, et al. Towards  
607 Optimized Care After Bariatric Surgery by Physical Activity and Exercise Intervention: a Review.  
608 *Obesity Surgery*. 2020;30(3):1118-25. doi: [10.1007/s11695-020-04390-x](https://doi.org/10.1007/s11695-020-04390-x)
- 609 16. Kalarchian MA, Marcus MD, Courcoulas AP, Cheng Y, Levine MD. Preoperative lifestyle  
610 intervention in bariatric surgery: initial results from a randomized, controlled trial. *Obesity (Silver  
611 Spring)*. 2013;21(2):254-60. doi: [10.1002/oby.20069](https://doi.org/10.1002/oby.20069)
- 612 17. Koorts H, Eakin E, Estabrooks P, Timperio A, Salmon J, Bauman A. Implementation and  
613 scale up of population physical activity interventions for clinical and community settings: the  
614 PRACTIS guide. *International Journal of Behavioral Nutrition and Physical Activity*.  
615 2018;15(1):51. doi: [10.1186/s12966-018-0678-0](https://doi.org/10.1186/s12966-018-0678-0)
- 616 18. Jansen SC, Haveman-Nies A, Duijzer G, Ter Beek J, Hiddink GJ, Feskens EJM.  
617 Adapting the SLIM diabetes prevention intervention to a Dutch real-life setting: joint decision  
618 making by science and practice. *BMC Public Health*. 2013;13(1):457. doi: [10.1186/1471-2458-  
619 13-457](https://doi.org/10.1186/1471-2458-13-457)
- 620 19. van Dongen EJ, Leerlooijer JN, Steijns JM, Tieland M, de Groot LC, Haveman-Nies A.  
621 Translation of a tailored nutrition and resistance exercise intervention for elderly people to a  
622 real-life setting: adaptation process and pilot study. *BMC Geriatr*. 2017;17(1):25. doi:  
623 [10.1186/s12877-017-0413-8](https://doi.org/10.1186/s12877-017-0413-8)
- 624 20. Laddu D, Ma J, Kaar J, Ozemek C, Durant RW, Campbell T, et al. Health Behavior  
625 Change Programs in Primary Care and Community Practices for Cardiovascular Disease  
626 Prevention and Risk Factor Management Among Midlife and Older Adults: A Scientific  
627 Statement From the American Heart Association. *Circulation*. 2021;144(24):e533-e49. doi:  
628 [10.1161/CIR.0000000000001026](https://doi.org/10.1161/CIR.0000000000001026)
- 629 21. McElwaine KM, Freund M, Campbell EM, Bartlem KM, Wye PM, Wiggers JH.  
630 Systematic review of interventions to increase the delivery of preventive care by primary care  
631 nurses and allied health clinicians. *Implement Sci*. 2016;11:50. doi: [10.1186/s13012-016-0409-3](https://doi.org/10.1186/s13012-016-0409-3)
- 632 22. Estabrooks PA, Glasgow RE. Translating Effective Clinic-Based Physical Activity  
633 Interventions into Practice. *American Journal of Preventive Medicine*. 2006;31(4,  
634 Supplement):45-56. doi: <https://doi.org/10.1016/j.amepre.2006.06.019>
- 635 23. Clark RE, McArthur C, Papaioannou A, Cheung AM, Laprade J, Lee L, et al. "I do not  
636 have time. Is there a handout I can use?": combining physicians' needs and behavior change  
637 theory to put physical activity evidence into practice. *Osteoporos Int*. 2017;28(6):1953-63. doi:  
638 [10.1007/s00198-017-3975-6](https://doi.org/10.1007/s00198-017-3975-6)
- 639 24. Hanapi NHM, Yuliawiratman BS, Lai LL, Halil H, Koo JG, Suhaimi A. Optimising the  
640 Bariatric Patients' Outcome through Cardiac Rehabilitation Approach. *Obesity Surgery*.  
641 2018;28(7):2130-4. doi: [10.1007/s11695-018-3256-2](https://doi.org/10.1007/s11695-018-3256-2)



- 642 25. Gallo PM. The United States Registry for Exercise Professionals: How it Works and  
643 Ways it Can Advance the Fitness Profession. *ACSMS Health Fit J.* 2023;27(2):51-3. doi:  
644 10.1249/fit.0000000000000843
- 645 26. Slade SC, Dionne CE, Underwood M, Buchbinder R. Consensus on Exercise Reporting  
646 Template (CERT): Explanation and Elaboration Statement. *Br J Sports Med.* 2016;50(23):1428-  
647 37. doi: 10.1136/bjsports-2016-096651
- 648 27. Villa-González E, Barranco-Ruiz Y, Rodríguez-Pérez MA, Carretero-Ruiz A, García-  
649 Martínez JM, Hernández-Martínez A, et al. Supervised exercise following bariatric surgery in  
650 morbid obese adults: CERT-based exercise study protocol of the EFIBAR randomised  
651 controlled trial. *BMC Surgery.* 2019;19(1):127. doi: 10.1186/s12893-019-0566-9
- 652 28. AGREE Collaboration. Development and validation of an international appraisal  
653 instrument for assessing the quality of clinical practice guidelines: the AGREE project. *Qual Saf*  
654 *Health Care.* 2003;12(1):18-23. doi: 10.1136/qhc.12.1.18
- 655 29. Hsieh H-F, Shannon SE. Three approaches to qualitative content analysis. *Qualitative*  
656 *health research.* 2005;15(9):1277-88. doi: 10.1177/1049732305276687
- 657 30. Righi C, James J, Beasley M, Day DL, Fox JE, Gieber J, et al. Card sort analysis best  
658 practices. *J Usability Studies.* 2013;8(3):69–89. doi:
- 659 31. Rokach L, Maimon O. Clustering Methods. In: Maimon O, Rokach L, editors. *Data*  
660 *Mining and Knowledge Discovery Handbook.* Boston, MA: Springer US; 2005. p. 321-52.
- 661 32. Rauch W. The decision Delphi. *Technological Forecasting and Social Change.*  
662 1979;15(3):159-69. doi: [https://doi.org/10.1016/0040-1625\(79\)90011-8](https://doi.org/10.1016/0040-1625(79)90011-8)
- 663 33. Jamnik VK, Warburton DE, Makarski J, McKenzie DC, Shephard RJ, Stone JA, et al.  
664 Enhancing the effectiveness of clearance for physical activity participation: background and  
665 overall process. *Appl Physiol Nutr Metab.* 2011;36 Suppl 1:S3-13. doi: 10.1139/h11-044
- 666 34. Page MJ, McKenzie JE, Bossuyt PM, Boutron I, Hoffmann TC, Mulrow CD, et al.  
667 Updating guidance for reporting systematic reviews: development of the PRISMA 2020  
668 statement. *Journal of Clinical Epidemiology.* 2021;134:103-12. doi:  
669 <https://doi.org/10.1016/j.jclinepi.2021.02.003>
- 670 35. American Physical Therapy Association. About Physical Therapists and Physical  
671 Therapist Assistants 2023 [Available from: [https://www.choosept.com/why-physical-](https://www.choosept.com/why-physical-therapy/about-physical-therapists-and-physical-therapist-assistants)  
672 [therapy/about-physical-therapists-and-physical-therapist-assistants.](https://www.choosept.com/why-physical-therapy/about-physical-therapists-and-physical-therapist-assistants)
- 673 36. American College of Sports Medicine. ACSM Certified Exercise Physiologist: Exam  
674 Content Outline 2023 [Available from: [https://www.acsm.org/docs/default-source/certification-](https://www.acsm.org/docs/default-source/certification-documents/acsmep_examcontentoutline_2020.pdf?sfvrsn=d413f75_16)  
675 [documents/acsmep\\_examcontentoutline\\_2020.pdf?sfvrsn=d413f75\\_16.](https://www.acsm.org/docs/default-source/certification-documents/acsmep_examcontentoutline_2020.pdf?sfvrsn=d413f75_16)
- 676 37. Froment FP, Olson KA, Hooper TL, Shaffer SM, Sizer PS, Woodhouse LJ, et al. Large  
677 variability found in musculoskeletal physiotherapy scope of practice throughout WCPT and  
678 IFOMPT affiliated countries: An international survey. *Musculoskeletal Science and Practice.*  
679 2019;42:104-19. doi: <https://doi.org/10.1016/j.msksp.2019.04.012>
- 680 38. World Confederation for Physical Therapy. Description of physical therapy: Policy  
681 statement. 2019.
- 682 39. Heimerl F, Lohmann S, Lange S, Ertl T. Word Cloud Explorer: Text Analytics Based on  
683 Word Clouds. *Proceedings of the 2014 47th Hawaii International Conference on System*  
684 *Sciences: IEEE Computer Society;* 2014. p. 1833–42. doi: 10.1109/hicss.2014.231
- 685 40. Zagarins SE, Allen NA, Skinner SS, Kemper AJ, Welch G. Improved exercise behaviors  
686 associated with a comprehensive structured exercise program following bariatric surgery.  
687 *Bariatric Nursing and Surgical Patient Care.* 2011;6(2):85-90. doi: 10.1089/bar.2011.9971
- 688 41. Woodlief TL, Carnero EA, Standley RA, Distefano G, Anthony SJ, Dubis GS, et al. Dose  
689 response of exercise training following roux-en-Y gastric bypass surgery: A randomized trial.  
690 *Obesity (Silver Spring).* 2015;23(12):2454-61. doi: 10.1002/oby.21332

- 691 42. Wiklund M, Sundqvist E, Olsén MF. Physical Activity in the Immediate Postoperative  
692 Phase in Patients Undergoing Roux-en-Y Gastric Bypass-a Randomized Controlled Trial.  
693 Obesity Surgery. 2015;25(12):2245-50. doi: 10.1007/s11695-015-1690-y
- 694 43. Tardif I, Auclair A, Piché M-E, Biertho L, Marceau S, Hould F-S, et al. Impact of a 12-  
695 Week Randomized Exercise Training Program on Lipid Profile in Severely Obese Patients  
696 Following Bariatric Surgery. Obesity Surgery. 2020;30(8):3030-6. doi: 10.1007/s11695-020-  
697 04647-5
- 698 44. Stolberg CR, Mundbjerg LH, Funch-Jensen P, Gram B, Bladbjerg E-M, Juhl CB. Effects  
699 of gastric bypass surgery followed by supervised physical training on inflammation and  
700 endothelial function: A randomized controlled trial. Atherosclerosis. 2018;273:37-44. doi:  
701 10.1016/j.atherosclerosis.2018.04.002
- 702 45. Stolberg CR, Mundbjerg LH, Funch-Jensen P, Gram B, Bladbjerg E-M, Juhl CB. Reply  
703 to: "Replicability of exercise programs following bariatric surgery". Atherosclerosis.  
704 2018;278:332-3. doi: 10.1016/j.atherosclerosis.2018.09.028
- 705 46. Stolberg CR, Mundbjerg LH, Bladbjerg E-M, Funch-Jensen P, Gram B, Juhl CB.  
706 Physical training following gastric bypass: effects on physical activity and quality of life-a  
707 randomized controlled trial. Quality of Life Research. 2018;27(12):3113-22. doi:  
708 10.1007/s11136-018-1938-9
- 709 47. Stegen S, Derave W, Calders P, Laethem CV, Pattyn P. Physical fitness in morbidly  
710 obese patients: effect of gastric bypass surgery and exercise training. Obesity Surgery.  
711 2011;21(1):61-70. doi: 10.1007/s11695-009-0045-y
- 712 48. Soriano-Maldonado A, Martínez-Forte S, Ferrer-Márquez M, Martínez-Rosales E,  
713 Hernández-Martínez A, Carretero-Ruiz A, et al. Physical Exercise following bariatric surgery in  
714 women with Morbid obesity. Medicine (Baltimore). 2020;99(12). doi:  
715 10.1097/MD.00000000000019427
- 716 49. Silva TLTBd, Fontes MT, Mariano RD, Mota MM. Effects of the program of supervised  
717 exercise on body composition after bariatric surgery: case report. Revista Brasileira de  
718 Obesidade, Nutrição e Emagrecimento. 2015;9(52). doi:  
719 50. Shah M, Snell PG, Rao S, Adams-Huet B, Quittner C, Livingston EH, et al. High-volume  
720 exercise program in obese bariatric surgery patients: a randomized, controlled trial. Obesity  
721 (Silver Spring). 2011;19(9):1826-34. doi: 10.1038/oby.2011.172
- 722 51. Rothwell L, Lilian Kow JT. Effect of a post-operative structured exercise programme on  
723 short-term weight loss after obesity surgery using adjustable gastric bands. Obesity Surgery.  
724 2015;25(1):126-8. doi: 10.1007/s11695-014-1323-x
- 725 52. Rojhani-Shirazi Z, Mansoriyan SA, Hosseini SV. The effect of balance training on clinical  
726 balance performance in obese patients aged 20–50 years old undergoing sleeve gastrectomy.  
727 European Surgery. 2016;48:105-9. doi: 10.1007/s10353-015-0379-8
- 728 53. Ricci PA, Thommazo-Luporini LD, Jürgensen SP, André LD, Haddad GF, Arena R, et al.  
729 Effects of Whole-Body Electromyostimulation Associated with Dynamic Exercise on Functional  
730 Capacity and Heart Rate Variability After Bariatric Surgery: a Randomized, Double-Blind, and  
731 Sham-Controlled Trial. Obesity Surgery. 2020;30(10):3862-71. doi: 10.1007/s11695-020-04724-  
732 9
- 733 54. Proulx É, Auclair A, Piché M-E, Harvey J, Pettigrew M, Biertho L, et al. Safety of Blood  
734 Glucose Response Following Exercise Training After Bariatric Surgery. Obesity Surgery.  
735 2018;28(12):3976-83. doi: 10.1007/s11695-018-3449-8
- 736 55. Powell SM, Fasczewski KS, Gill DL, Davis PG. Go with the FLOW: Implementation of a  
737 psychological skills intervention in an exercise program for post-bariatric surgery patients.  
738 Journal of Health Psychology. 2020;25(13-14):2260-71. doi: 10.1177/1359105318793182
- 739 56. Powell SM, Fasczewski KS, Gill DL, Davis PG. Go with the FLOW: Implementation of a  
740 psychological skills intervention in an exercise program for post-bariatric surgery patients.  
741 Journal of Health Psychology. 2018:1-12. doi: 10.1177/1359105318793182

- 742 57. Picó-Sirvent I, Aracil-Marco A, Pastor D, Moya-Ramón M. Effects of a Combined High-  
743 Intensity Interval Training and Resistance Training Program in Patients Awaiting Bariatric  
744 Surgery: A Pilot Study. *Sports (Basel)*. 2019;7(3):72. doi: 10.3390/sports7030072
- 745 58. Parikh M, Dasari M, McMacken M, Ren C, Fielding G, Ogedegbe G. Does a  
746 preoperative medically supervised weight loss program improve bariatric surgery outcomes? A  
747 pilot randomized study. *Surgical Endoscopy*. 2012;26:853-61. doi: 10.1007/s00464-011-1966-9
- 748 59. Onofre T, Carlos R, Oliver N, Felismino A, Fialho D, Corte R, et al. Effects of a Physical  
749 Activity Program on Cardiorespiratory Fitness and Pulmonary Function in Obese Women after  
750 Bariatric Surgery: a Pilot Study. *Obesity Surgery*. 2017;27(8):2026-33. doi: 10.1007/s11695-  
751 017-2584-y
- 752 60. Oliveira JJJd, Freitas ACTd, Almeida AAd. Postoperative effect of physical therapy  
753 related to functional capacity and respiratory muscle strength in patients submitted to bariatric  
754 surgery. *Arquiox Brasileios de Cirurgia Digestiva*. 2016;28:43-7. doi: 10.1590/0102-  
755 6720201600S10012
- 756 61. Ng DP, McClements KE, Yeo A, Chen X, Png EK, Ng C. Efficacy of supervised exercise  
757 training in patients post bariatric surgery. *Physiotherapy*. 2015;101:E1083-E4. doi:  
758 <https://doi.org/10.1016/j.physio.2015.03.1973>
- 759 62. Muschitz C, Kocijan R, Haschka J, Zendeli A, Pirker T, Geiger C, et al. The Impact of  
760 Vitamin D, Calcium, Protein Supplementation, and Physical Exercise on Bone Metabolism After  
761 Bariatric Surgery: The BABS Study. *Journal of Bone and Mineral Research*. 2016;31(3):672-82.  
762 doi: 10.1002/jbmr.2707
- 763 63. Mundbjerg LH, Stolberg CR, Cecere S, Bladbjerg E-M, Funch-Jensen P, Gram B, et al.  
764 Supervised Physical Training Improves Weight Loss After Roux-en-Y Gastric Bypass Surgery: A  
765 Randomized Controlled Trial. *Obesity (Silver Spring)*. 2018;26(5):828-37. doi:  
766 10.1002/oby.22143
- 767 64. Mundbjerg LH, Stolberg CR, Bladbjerg E-M, Funch-Jensen P, Juhl CB, Gram B. Effects  
768 of 6 months supervised physical training on muscle strength and aerobic capacity in patients  
769 undergoing Roux-en-Y gastric bypass surgery: a randomized controlled trial. *Clinical Obesity*.  
770 2018;8(4):227-35. doi: 10.1111/cob.12256
- 771 65. Morana C, Collignon M, Nocca D. Effectiveness of a Functional Rehabilitation Program  
772 After Bariatric Surgery: a Pilot Study. *Obesity Surgery*. 2018;28(8):2321-6. doi: 10.1007/s11695-  
773 018-3154-7
- 774 66. Marcon ER, Gus I, Neumann CR. Impact of a minimum program of supervised exercises  
775 in the cardiometabolic risk in patients with morbid obesity. *Arquiox Brasileios de*  
776 *Endocrinologia e Metabologia*. 2011;55(5):331-8. doi: 10.1590/s0004-27302011000500006
- 777 67. Marcon ER, Baglioni S, Bittencourt L, Lopes CLN, Neumann CR, Trindade MRM. What  
778 Is the Best Treatment before Bariatric Surgery? Exercise, Exercise and Group Therapy, or  
779 Conventional Waiting: a Randomized Controlled Trial. *Obesity Surgery*. 2017;27:763-73. doi:  
780 10.1007/s11695-016-2365-z
- 781 68. Marchesi F, Sario GD, Reggiani V, Tartamella F, Giammaresi A, Cecchini S, et al. Road  
782 Running After Gastric Bypass for Morbid Obesity: Rationale and Results of a New Protocol.  
783 *Obesity Surgery*. 2015;25(7):1162-70. doi: 10.1007/s11695-014-1517-2
- 784 69. Marc-Hernández A, Ruiz-Tovar J, Aracil A, Guillén S, Moya-Ramón M. Impact of  
785 Exercise on Body Composition and Cardiometabolic Risk Factors in Patients Awaiting Bariatric  
786 Surgery. *Obesity Surgery*. 2019;29(12):3891-900. doi: 10.1007/s11695-019-04088-9
- 787 70. Lopez YON, Coen PM, GoodpasteR BH, Seyhan AA. Gastric bypass surgery with  
788 exercise alters plasma microRNAs that predict improvements in cardiometabolic risk.  
789 *International Journal of Obesity*. 2017;41(7):1121-30. doi: 10.1038/ijo.2017.84
- 790 71. Klasnja P, Rosenberg DE, Zhou J, Anau J, Gupta A, Arterburn DE. A quality-  
791 improvement optimization pilot of BariFit, a mobile health intervention to promote physical

- 792 activity after bariatric surgery. *Translational Behavioral Medicine*. 2020;1-10. doi:  
793 10.1093/tbm/ibaa040
- 794 72. Kerrigan DJ, Loduca-Duhaime A, Carlin AM, Szymanski W, Genaw J. A trans-  
795 disciplinary approach to weight loss in the super super morbidly obese. *Journal of Clinical*  
796 *Exercise Physiology*. 2012;1(1):30-4. doi: <https://doi.org/10.31189/2165-6193-1.1.30>
- 797 73. Kelley W. Medically integrated exercise: Florida hospital celebration health bariatric  
798 program. *ACSM's Health & Fitness Journal*. 2006;10(6):28-30. doi:  
799 10.1007/s11695-020-04489-1.
- 800 74. Jiménez-Loaisa A, González-Cutre D, Beltrán-Carrillo VJ, Alcaraz-Ibáñez M. Changes in  
801 Bariatric Patients' Physical Activity Levels and Health-Related Quality of Life Following a  
802 Postoperative Motivational Physical Activity Intervention. *Obesity Surgery*. 2020;30(6):2302-12.  
803 doi: 10.1007/s11695-020-04489-1.
- 804 75. Jassil FC, Manning S, Lewis N, Steinmo S, Kingett H, Lough F, et al. Feasibility and  
805 Impact of a Combined Supervised Exercise and Nutritional-Behavioral Intervention following  
806 Bariatric Surgery: A Pilot Study. *Journal of Obesity*. 2015;2015:12. doi:  
807 <https://doi.org/10.1155/2015/693829>
- 808 76. Huck CJ. Effects of supervised resistance training on fitness and functional strength in  
809 patients succeeding bariatric surgery. *Journal of Strength and Conditioning Research*.  
810 2015;29(3):589-95. doi: 10.1519/JSC.0000000000000667
- 811 77. Hickey MS, Gavigan KE, McCammon MR, Tyndhall GL, Pories WJ, Israel RG, et al.  
812 Effects of 7 days of exercise training on insulin action in morbidly obese men. *Clinical Exercise*  
813 *Physiology*. 1999;1(1):24-8.
- 814 78. Hassannejad A, Khalaj A, Mansournia MA, Tabesh MR, Alizadeh Z. The Effect of  
815 Aerobic or Aerobic-Strength Exercise on Body Composition and Functional Capacity in Patients  
816 with BMI  $\geq 35$  after Bariatric Surgery: a Randomized Control Trial. *Obesity Surgery*.  
817 2017;27(11):2792-801. doi: 10.1007/s11695-017-2717-3
- 818 79. Hanvold SE, Vinknes KJ, Løken EB, Hjartåker A, Klungsøyr O, Birkeland E, et al. Does  
819 Lifestyle Intervention After Gastric Bypass Surgery Prevent Weight Regain? A Randomized  
820 Clinical Trial. *Obesity Surgery*. 2019;29(11). doi: 10.1007/s11695-019-04109-7
- 821 80. Hamdy O, Ashrafzadeh S, Mottalib A. Weight Management in Patients with Type 2  
822 Diabetes: a Multidisciplinary Real-world Approach. *Current Diabetes Reports*. 2018;18(9). doi:  
823 10.1007/s11892-018-1030-4
- 824 81. Halperin F, Ding S-A, Simonson DC, Panosian J, Goebel-Fabbri A, Wewalka M, et al.  
825 Roux-en-Y gastric bypass surgery or lifestyle with intensive medical management in patients  
826 with type 2 diabetes: feasibility and 1-year results of a randomized clinical trial. *JAMA Surgery*.  
827 2014;149(7):716-26. doi: 10.1001/jamasurg.2014.514
- 828 82. Gonzalez-Cutre D, Jimenez-Loaisa A, Romero-Elias M, Beltran-Carrillo VJ. Exploring  
829 bariatric patients' need for novelty in a motivational physical activity program: a qualitative study.  
830 *European Journal of Human Movement*. 2019;43:1-12.
- 831 83. Gill DL, Fasczewski KS, Reifsteck EJ, Rothberger SM, Davis PG. Evaluation of an  
832 exercise programme for post-bariatric surgery patients: views of participants. *Obesity Science &*  
833 *Practice*. 2018;4(3):259-67. doi: 10.1002/osp4.165
- 834 84. Funderburk JA, Callis S. Aquatic intervention effect on the quality of life prior to obesity  
835 surgery: a pilot study. *Annual in Therapeutic Recreation*; 2010.
- 836 85. Egberts KJ, Brown W, O'Brien PE. Optimising lifestyle factors to achieve weight loss in  
837 surgical patients. *Obesity Research & Clinical Practice*. 2010;4:S13. doi:  
838 <https://doi.org/10.1016/j.orcp.2010.09.026>
- 839 86. Egberts K, Brown W, O'Brien P. Optimising lifestyle factors to achieve weight loss in  
840 surgical patients. *Surgery for Obesity and Related Diseases*. 2011;7:368. doi:  
841 10.1016/j.orcp.2010.09.026
- 842 87. Daniels P, Burns RD, Brusseau TA, Hall MS, Davidson L, Adams TD, et al. Effect of a  
843 randomised 12-week resistance training programme on muscular strength, cross-sectional area



- 843 and muscle quality in women having undergone Roux-en-Y gastric bypass. *Journal of Sports*  
844 *Sciences*. 2018;36(5):529-35. doi: 10.1080/02640414.2017.1322217
- 845 88. Creel DB, Schuh LM, Reed CA, Gomez AR, Hurst LA, Stote J, et al. A randomized trial  
846 comparing two interventions to increase physical activity among patients undergoing bariatric  
847 surgery. *Obesity (Silver Spring)*. 2016;24(8):1660-8. doi: 10.1002/oby.21548
- 848 89. Coen PM, Tanner CJ, Helblin NL, Dubis GS, Hames KC, Xie H, et al. Clinical trial  
849 demonstrates exercise following bariatric surgery improves insulin sensitivity. *Journal of Clinical*  
850 *Investigation*. 2015;125(1):248-57. doi: 10.1172/JCI78016
- 851 90. Coen PM, Menshikova EV, Distefano G, Zheng D, Tanner CJ, Standley RA, et al.  
852 Exercise and Weight Loss Improve Muscle Mitochondrial Respiration, Lipid Partitioning, and  
853 Insulin Sensitivity After Gastric Bypass Surgery. *Diabetes*. 2015;64(11):3737-50. doi:  
854 10.2337/db15-0809
- 855 91. Castello-Simões V, Simões RP, Beltrame T, Bassi D, Catai AM, Arena R, et al. Effects  
856 of aerobic exercise training on variability and heart rate kinetic during submaximal exercise after  
857 gastric bypass surgery – a randomized controlled trial. *Disability and Rehabilitation*.  
858 2013;35(4):334-42. doi: 10.3109/09638288.2012.694575
- 859 92. Castello V, Simões RP, Bassi D, Catai AM, Arena R, Borghi-Silva A. Impact of aerobic  
860 exercise training on heart rate variability and functional capacity in obese women after gastric  
861 bypass surgery. *Obesity Surgery*. 2011;21(11):1739-49. doi: 10.1007/s11695-010-0319-4
- 862 93. Carnero EA, Dubis GS, Hames KC, Jakicic JM, Houmard JA, Coen PM, et al.  
863 Randomized trial reveals that physical activity and energy expenditure are associated with  
864 weight and body composition after RYGB. *Obesity (Silver Spring)*. 2017;25(7):1206-16. doi:  
865 10.1002/oby.21864
- 866 94. Campanha-Versiani L, Pereira DAG, Ribeiro-Samora GA, Ramos AV, Diniz MFHdS,  
867 Marco LAD, et al. The Effect of a Muscle Weight-Bearing and Aerobic Exercise Program on the  
868 Body Composition, Muscular Strength, Biochemical Markers, and Bone Mass of Obese Patients  
869 Who Have Undergone Gastric Bypass Surgery. *Obesity Surgery*. 2017;27(8):2129-37. doi:  
870 10.1007/s11695-017-2618-5
- 871 95. Brown WA, Burton PR, Shaw K, Smith B, Maffescioni S, Comitti B, et al. A Pre-Hospital  
872 Patient Education Program Improves Outcomes of Bariatric Surgery. *Obesity Surgery*.  
873 2016;26(9):2074-81. doi: 10.1007/s11695-016-2075-6
- 874 96. Brandenburg D, Kotlowski R. Practice makes perfect? Patient response to a prebariatric  
875 surgery behavior modification program. *Obesity Surgery*. 2005;15(1):125-32. doi:  
876 10.1381/0960892052993594
- 877 97. Bond DS, Vithianathan S, Thomas JG, Trautvetter J, Unick JL, Jakicic JM, et al. Bari-  
878 Active: a randomized controlled trial of a preoperative intervention to increase physical activity in  
879 bariatric surgery patients. *Surgery for Obesity and Related Diseases*. 2015;11(1):169-77. doi:  
880 10.1016/j.soard.2014.07.010
- 881 98. Bond DS, Thomas JG, King WC, Vithianathan S, Trautvetter J, Unick JL, et al. Exercise  
882 improves quality of life in bariatric surgery candidates: results from the Bari-Active trial. *Obesity*  
883 *Journal*. 2015;23(3):536-42. doi: 10.1002/oby.20988
- 884 99. Bond D, Thomas J, Vithianathan S, Unick J, Webster J, Roye G, et al. Intervention-  
885 related increases in preoperative physical activity are maintained 6-months after Bariatric  
886 surgery: results from the bari-active trial. *International Journal of Obesity*. 2017;41:467-70. doi:  
887 10.1038/ijo.2016.237
- 888 100. Berggren JR, Boyle KE, Chapman WH, Houmard JA. Skeletal muscle lipid oxidation and  
889 obesity: influence of weight loss and exercise. *Am J Physiol Endocrinol Metab*. 2008(294):E726-  
890 E32. doi: 10.1152/ajpendo.00354.2007
- 891 101. Baillot A, Vallée C-A, Mampuya WM, Dionne IJ, Comeau E, Méziat-Burdin A, et al.  
892 Effects of a Pre-surgery Supervised Exercise Training 1 Year After Bariatric Surgery: a

- 893 Randomized Controlled Study. *Obesity Surgery*. 2018;28(4):955-62. doi: 10.1007/s11695-017-  
894 2943-8
- 895 102. Baillot A, Mampuya WM, Dionne sJ, Comeau E, Méziat-Burdin A, Langlois M-F. Impacts  
896 of Supervised Exercise Training in Addition to Interdisciplinary Lifestyle Management in  
897 Subjects Awaiting Bariatric Surgery: a Randomized Controlled Study. *Obesity Surgery*.  
898 2016;26(11):2602-10. doi: 10.1007/s11695-016-2153-9
- 899 103. Baillot A, Mampuya WM, Comeau E, Méziat-Burdin A, Langlois MF. Feasibility and  
900 impacts of supervised exercise training in subjects with obesity awaiting bariatric surgery: a pilot  
901 study. *Obesity Surgery*. 2013;23(7):882-91. doi: 10.1007/s11695-013-0875-5
- 902 104. Baillot A, Boissy P, Tousignant M, Langlois M-F. Feasibility and effect of in-home  
903 physical exercise training delivered via telehealth before bariatric surgery. *Journal of*  
904 *Telemedicine and Telecare*. 2016;23(5):529-35. doi: 10.1177/1357633X16653511
- 905 105. Audrey Auclair, Harvey J, Leclerc J, Pich M-E, Kim O'Connor M, Nadreau É, et al.  
906 Determinants of Cardiorespiratory Fitness After Bariatric Surgery: Insights From a Randomised  
907 Controlled Trial of a Supervised Training Program. *Canadian Journal of Cardiology*.  
908 2020;37(2):251-9. doi: 10.1016/j.cjca.2020.03.032
- 909 106. Coleman KJ, Caparosa SL, Nichols JF, Fujioka K, Koebnick C, McCloskey KN, et al.  
910 Understanding the Capacity for Exercise in Post-Bariatric Patients. *Obesity Surgery*.  
911 2017;27(1):51-8. doi: 10.1007/s11695-016-2240-y
- 912 107. Gilbertson NM, Gaitán JM, Osinski V, Rexrode EA, Garmey JC, Mehaffey JH, et al. Pre-  
913 operative aerobic exercise on metabolic health and surgical outcomes in patients receiving  
914 bariatric surgery: A pilot trial. *PLoS One*. 2020;15(10). doi: 10.1371/journal.pone.0239130
- 915 108. Panosian J, Ding S-A, Wewalka M, Simonson DC, Goebel-Fabbri A, Foster K, et al.  
916 Physical activity in obese type 2 diabetes after gastric bypass or medical management. *The*  
917 *American Journal of Medicine*. 2017;130(1):83-92. doi: 10.1016/j.amjmed.2016.07.019
- 918 109. Lemieux-Simard C, Pettigrew M, Auclair A, Piche ME, Biertho L, Marceau S, et al.  
919 Impact of a 12-week supervised exercise program on weight loss trajectory, daily physical  
920 activity levels and sedentary behaviors after bariatric surgery. *European Heart Journal*. 2021;42.  
921 doi: 10.1093/eurheartj/ehab724.2605
- 922 110. Pettigrew M, Auclair A, Harvey J, Marceau S, Biertho L, Poirier P. Daily physical activity  
923 level after bariatric surgery and a 12-week supervised exercise program: Are they active  
924 enough? *Canadian Journal of Cardiology*. 2019;35(10).
- 925 111. Brun J-F, Lasteyrie V, Hammoudi L, Nocca D, Ghanassia E, Noirez P, et al. Exercise  
926 targeted at the level of maximal lipid oxidation (LIPOXmax) improves weight loss, decreases  
927 orexigenic pulsions and increases satiety after sleeve gastrectomy. *Global Journal of Obesity,*  
928 *Diabetes and Metabolic Syndrome*. 2019;6(2):17-21. doi: 10.17352/2455-8583.000037
- 929 112. Gil S, Kirwan JP, Murai IH, Dantas WS, Merege-Filho CAA, Ghosh S, et al. A  
930 randomized clinical trial on the effects of exercise on muscle remodelling following bariatric  
931 surgery. *Journal of Cachexia, Sarcopenia, and Muscle*. 2021;12(6):1440-55. doi:  
932 10.1002/jcsm.12815
- 933 113. Gil S, Peçanha T, Dantas WS, Murai IH, Merege-Filho CAA, Sá-Pinto ALd, et al.  
934 Exercise Enhances the Effect of Bariatric Surgery in Markers of Cardiac Autonomic Function.  
935 *Obesity Surgery*. 2021;31(3):1381-6. doi: 10.1007/s11695-020-05053-7
- 936 114. Murai IH, Roschel H, Dantas WS, Gil S, Merege-Filho C, Cleva Rd, et al. Exercise  
937 Mitigates Bone Loss in Women With Severe Obesity After Roux-en-Y Gastric Bypass: A  
938 Randomized Controlled Trial. *Journal of Clinical Endocrinology and Metabolism*.  
939 2019;104(10):4639-50. doi: 10.1210/jc.2019-00074
- 940 115. Herrera A, Tabach A, Andaur K, Zamuner A. Effect of physical exercise in bariatric  
941 surgery patients: protocol of a randomized controlled clinical trial. *Trials*. 2020;22. doi:  
942 <https://doi.org/10.1186/s13063-021-05056-4>



- 943 116. Marc-Hernández A, Ruiz-Tovar J, Aracil A, Guillén S, Moya-Ramón M. Effects of a High-  
944 Intensity Exercise Program on Weight Regain and Cardio-metabolic Profile after 3 Years of  
945 Bariatric Surgery: A Randomized Trial. *Scientific Reports*. 2020;10(1):3123. doi:  
946 10.1038/s41598-020-60044-z
- 947 117. Artero EG, Ferrez-Márquez M, Torrente-Sánchez MJ, Martínez-Rosales E, Carretero-  
948 Ruiz A, Hernández-Martínez A, et al. Supervised Exercise Immediately After Bariatric Surgery:  
949 the Study Protocol of the EFIBAR Randomized Controlled Trial. *Obesity Surgery*.  
950 2021;31(10):4227-35. doi: 10.1007/s11695-021-05559-8
- 951 118. Balady GJ, Williams MA, Ades PA, Bittner V, Comoss P, Foody JM, et al. Core  
952 components of cardiac rehabilitation/secondary prevention programs: 2007 update: a scientific  
953 statement from the American Heart Association Exercise, Cardiac Rehabilitation, and  
954 Prevention Committee, the Council on Clinical Cardiology; the Councils on Cardiovascular  
955 Nursing, Epidemiology and Prevention, and Nutrition, Physical Activity, and Metabolism; and the  
956 American Association of Cardiovascular and Pulmonary Rehabilitation. *Circulation*.  
957 2007;115(20):2675-82. doi: 10.1161/circulationaha.106.180945
- 958 119. Hamm LF, Sanderson BK, Ades PA, Berra K, Kaminsky LA, Roitman JL, et al. Core  
959 Competencies for Cardiac Rehabilitation/Secondary Prevention Professionals: 2010 Update:  
960 Position Statement of the American Association of Cardiovascular and Pulmonary  
961 Rehabilitation. *Journal of Cardiopulmonary Rehabilitation and Prevention*. 2011;31(1):2-10. doi:  
962 10.1097/HCR.0b013e318203999d
- 963 120. Stults-Kolehmainen MA, Sinha R. The effects of stress on physical activity and exercise.  
964 *Sports Medicine*. 2014;44(1):81-121. doi: 10.1007/s40279-013-0090-5
- 965 121. Han S, Agostini G, Brewis AA, Wutich A. Avoiding exercise mediates the effects of  
966 internalized and experienced weight stigma on physical activity in the years following bariatric  
967 surgery. *BMC Obes*. 2018;5:18. doi: 10.1186/s40608-018-0195-3
- 968 122. Mechanick JI, Youdim A, Jones DB, Timothy Garvey W, Hurley DL, Molly McMahon M,  
969 et al. Clinical Practice Guidelines for the Perioperative Nutritional, Metabolic, and Nonsurgical  
970 Support of the Bariatric Surgery Patient—2013 Update: Cosponsored by American Association  
971 of Clinical Endocrinologists, The Obesity Society, and American Society for Metabolic &  
972 Bariatric Surgery. *Surgery for Obesity and Related Diseases*. 2013;9(2):159-91. doi:  
973 <https://doi.org/10.1016/j.soard.2012.12.010>
- 974 123. Mechanick JI, Apovian C, Brethauer S, Garvey WT, Joffe AM, Kim J, et al. Clinical  
975 practice guidelines for the perioperative nutrition, metabolic, and nonsurgical support of patients  
976 undergoing bariatric procedures – 2019 update: cosponsored by American Association of  
977 Clinical Endocrinologists/American College of Endocrinology, The Obesity Society, American  
978 Society for Metabolic & Bariatric Surgery, Obesity Medicine Association, and American Society  
979 of Anesthesiologists. *Surgery for Obesity and Related Diseases*. 2020;16(2):175-247. doi:  
980 <https://doi.org/10.1016/j.soard.2019.10.025>
- 981 124. Bellicha A, Ciangura C, Poitou C, Portero P, Oppert J-M. Effectiveness of exercise  
982 training after bariatric surgery—a systematic literature review and meta-analysis. *Obesity*  
983 *Reviews*. 2018;19(11):1544-56. doi: <https://doi.org/10.1111/obr.12740>
- 984 125. American Society for Metabolic and Bariatric Surgery. About the ASMBS Integrated  
985 Health Section 2023 [Available from: <https://asmbs.org/integrated-health/about>].
- 986 126. Allied Health Professions Australia. Allied Health Professions: Exercise Physiology 2023  
987 [Available from: <https://ahpa.com.au/allied-health-professions/exercise-physiology/>].
- 988 127. Smart NA, Williams A, Lyndon K. The Role and Scope of Accredited Exercise  
989 Physiologists in the Australian Healthcare System. *Journal of Clinical Exercise Physiology*.  
990 2016;5(2):16-20. doi: 10.31189/2165-6193-5.2.16
- 991 128. Villa-González E, Barranco-Ruiz Y, Rodríguez-Pérez MA, Carretero-Ruiz A, García-  
992 Martínez JM, Hernández-Martínez A, et al. Supervised exercise following bariatric surgery in

993 morbid obese adults: CERT-based exercise study protocol of the EFIBAR randomised  
994 controlled trial. *BMC Surgery*. 2019;19(1):127. doi: 10.1186/s12893-019-0566-9  
995 129. Wulkan ML, Walsh SM. The multi-disciplinary approach to adolescent bariatric surgery.  
996 *Seminars in Pediatric Surgery*. 2014;23(1):2-4. doi:  
997 <https://doi.org/10.1053/j.sempedsurg.2013.10.012>  
998 130. Garneau P, Glazer S, Jackson T, Sampath S, Reed K, Christou N, et al. Guidelines for  
999 Canadian bariatric surgical and medical centres: a statement from the Canadian Association of  
1000 Bariatric Physicians and Surgeons. *Can J Surg*. 2022;65(2):E170-e7. doi: 10.1503/cjs.020719  
1001 131. Davies MJ, Aroda VR, Collins BS, Gabbay RA, Green J, Maruthur NM, et al.  
1002 Management of Hyperglycemia in Type 2 Diabetes, 2022. A Consensus Report by the American  
1003 Diabetes Association (ADA) and the European Association for the Study of Diabetes (EASD).  
1004 *Diabetes Care*. 2022;45(11):2753-86. doi: 10.2337/dci22-0034  
1005 132. Tolvanen L, Svensson Å, Hemmingsson E, Christenson A, Lagerros YT. Perceived and  
1006 Preferred Social Support in Patients Experiencing Weight Regain After Bariatric Surgery—a  
1007 Qualitative Study. *Obesity Surgery*. 2021;31(3):1256-64. doi: 10.1007/s11695-020-05128-5  
  
1008  
1009

1010

**Table 1A. Details of studies from the USA**

| Studies # * | First author                         | Year                           | Included in data extraction (co-authors MSK and MD) | Study Type               | Study Name  | Country of corresponding author | Setting                      | Program Type                                                                                                                     | Program length      | Mode of exercise training                                   | Patient contact frequency                                         | Exercise professional               | Training/education/credentialing (if noted)   |
|-------------|--------------------------------------|--------------------------------|-----------------------------------------------------|--------------------------|-------------|---------------------------------|------------------------------|----------------------------------------------------------------------------------------------------------------------------------|---------------------|-------------------------------------------------------------|-------------------------------------------------------------------|-------------------------------------|-----------------------------------------------|
| 1           | Berggren                             | 2008                           | X                                                   | Prospective intervention | None        | USA                             | University laboratory        | Supervised exercise training                                                                                                     | 10 consecutive days | Endurance training                                          | Daily                                                             | Masters-level graduate student      | American College of Sports Medicine (ACSM)    |
| 2-4         | Bond; Bond; Bond                     | 2015a; 2015b; 2017             | X                                                   | RCT                      | Bari-Active | USA                             | University hospital, at home | Behavioral intervention, counseling, physical activity tracking                                                                  | 6 weeks             | Home-based walking                                          | 1x/ week (weekly)                                                 | Doctoral-level graduate student     | Master's in physical activity-related studies |
| 5           | Brandenberg                          | 2005                           | X                                                   | Retrospective analysis   | None        | USA                             | University hospital          | Behavioral intervention, supervised liquid supplement diet                                                                       | 6 weeks             | Behavior modification component (non-exercise)              | 1x/ week (weekly)                                                 | Exercise specialist; psychologist   | Not noted                                     |
| 6-10        | Carnero; Coen; Coen; Lopez; Woodlief | 2017; 2015a; 2015b; 2017; 2015 | X                                                   | RCT                      | None        | USA                             | Public hospital; university  | Semi-supervised exercise training                                                                                                | 26 weeks            | Aerobic exercise (stationary cycling or walking)            | 3-5x/ week with at least one directly supervised session per week | Masters-level exercise physiologist | Master's in exercise physiology (EP)          |
| 11          | Coleman                              | 2016                           |                                                     | RCT                      | None        | USA                             | Private hospital, at home    | Supervised exercise training, phone counseling, daily pedometer, reading program curriculum, recording daily physical activities | 26 weeks            | Resistance training, aerobic exercise, flexibility training | 2x / week with 3x/ week of self-directed exercise                 | Not specified                       | Not specified                                 |
| 12          | Creel                                | 2016                           | X                                                   | RCT                      | None        | USA                             | Clinic                       | Exercise counseling with a pedometer                                                                                             | 26 weeks            | Walking                                                     | 3x/ week (2 weekdays and 1 weekend day)                           | Not specified                       | Not specified                                 |
| 13          | Daniels                              | 2018                           | X                                                   | RCT                      | None        | USA                             | University laboratory        | Supervised exercise training                                                                                                     | 12 weeks            | Resistance training                                         | 3x/ week                                                          | Doctoral-level graduate student     | ACSM EP and Certified Personal Trainer (CPT), |

|       |                           |                  |   |                                       |                     |     |                                                                  |                                                                         |                    |                                                                                   |                                                                             |                                                                                                                         |                                                            |
|-------|---------------------------|------------------|---|---------------------------------------|---------------------|-----|------------------------------------------------------------------|-------------------------------------------------------------------------|--------------------|-----------------------------------------------------------------------------------|-----------------------------------------------------------------------------|-------------------------------------------------------------------------------------------------------------------------|------------------------------------------------------------|
|       |                           |                  |   |                                       |                     |     |                                                                  |                                                                         |                    |                                                                                   |                                                                             |                                                                                                                         | NSCA Certified Strength and Conditioning Specialist (CSCS) |
| 14    | Funderburk                | 2010             | X | Quasi-experimental                    | None                | USA | University hospital                                              | Supervised exercise training                                            | 12 weeks           | Aquatic exercise                                                                  | 2x/ week                                                                    | Recreational therapist                                                                                                  | Licensed and nationally certified                          |
| 15    | Gilbertson                | 2020             |   | Pilot study                           | None                | USA | At home                                                          | Unsupervised exercise training with exercise diary and activity tracker | 30 days            | Aerobic exercise (walking)                                                        | 5x/ week                                                                    | Not specified                                                                                                           | Not specified                                              |
| 16-18 | Gill; Powell; Powell      | 2018; 2018; 2020 | X | Qualitative; prospective intervention | BELT program; FLOW  | USA | University, hospital                                             | Supervised exercise training; behavioral change intervention            | 12 weeks; 16 weeks | Aerobic exercise, resistance training                                             | 3x/ week                                                                    | Doctoral-level, registered clinical exercise physiologist (RCEP), Doctoral-level graduate students; assistant professor | ACSM, NASM                                                 |
| 19-21 | Halperin; Panosian; Hamdy | 2014; 2017; 2018 | X | RCT; review                           | Why WAIT; SLIMM-T2D | USA | Clinic; university hospital                                      | Supervised exercise training; unsupervised exercise training            | 12 weeks           | Aerobic exercise, resistance training, flexibility training                       | 3-4x/ week (Weeks 1-4); 5x/ week (Weeks 5-8); 6x/ week (Weeks 9-12); Weekly | RCEP                                                                                                                    | Masters in kinesiology and nutrition                       |
| 22    | Hickey                    | 1999             | X | Prospective intervention              | None                | USA | University laboratory                                            | Supervised exercise training                                            | 7 days             | Aerobic exercise (treadmill and cycle ergometer)                                  | Daily                                                                       | Masters-level graduate student                                                                                          | ACSM                                                       |
| 23    | Huck                      | 2015             | X | Quasi-experimental                    | None                | USA | University laboratory, private community-based training facility | Supervised exercise training                                            | 12 weeks           | Aerobic exercise, resistance training, stretching                                 | 2x/ week (Weeks 1-6); 3x/ per week (Weeks 6-12)                             | Graduate professor; CSCS, CPT                                                                                           | PhD                                                        |
| 24    | Kalarchian                | 2013             | X | RCT                                   | None                | USA | University hospital, bariatric clinic                            | Physician-supervised diet and exercise training                         | 26 weeks           | Participants were given a goal of 30 minutes of physical activity (PA) at least 5 | 12 individual, face-to-face sessions and 12 telephone contacts              | Non-exercise professionals                                                                                              | Not specified                                              |

|    |          |      |   |             |                |     |                                    |                                                                                                                                 |          |                                                                                                       |                                                                                                  |                                |                   |
|----|----------|------|---|-------------|----------------|-----|------------------------------------|---------------------------------------------------------------------------------------------------------------------------------|----------|-------------------------------------------------------------------------------------------------------|--------------------------------------------------------------------------------------------------|--------------------------------|-------------------|
|    |          |      |   |             |                |     |                                    |                                                                                                                                 |          | days per week (non-exercise)                                                                          |                                                                                                  |                                |                   |
| 25 | Kelley   | 2006 | X | Editorial   | Exercise Right | USA | Hospital                           | Unsupervised exercise training                                                                                                  | 6 weeks  | Not specified                                                                                         | Not specified other than post evaluation and quarterly or semiannual basis follow-up assessments | Exercise physiologist          | Bachelor's degree |
| 26 | Kerrigan | 2012 | X | Case study  | None           | USA | Hospital, bariatric center         | Unsupervised exercise training                                                                                                  | 8 weeks  | Aerobic exercise (walking, treadmill, recumbent stepper, swimming), chair aerobics                    | 3-4x/ week                                                                                       | Clinical exercise physiologist | Not specified     |
| 27 | Klasnja  | 2020 | X | Pilot study | BariFit        | USA | Public hospital                    | Mobile health intervention                                                                                                      | 16 weeks | Adaptive step goals                                                                                   | Daily                                                                                            | Research specialist            | Not specified     |
| 28 | Parikh   | 2012 | X | RCT         | None           | USA | University hospital                | Medically supervised weight management, nutrition, physical activity education, individualized behavior modification counseling | 26 weeks | Not specified                                                                                         | Monthly                                                                                          | Dietitian                      | Not specified     |
| 39 | Shah     | 2011 | X | RCT         | None           | USA | University hospital fitness center | Semi-supervised exercise training with exercise diaries and heart rate monitors                                                 | 12 weeks | Aerobic exercise                                                                                      | 5x/ week (with 1-2 days at the fitness center)                                                   | Exercise physiologist          | PhD               |
| 30 | Zagarins | 2011 | X | Descriptive | None           | USA | Hospital, at home                  | Supervised exercise training                                                                                                    | 12 weeks | Aerobic exercise (walking, treadmills, recumbent exercise bicycles, ellipticals), resistance training | 1x/ week (weekly)                                                                                | Exercise physiologist; CPT     | Not specified     |

\* Various trials/studies resulted in multiple publications, which were combined.

\*\* National Strength and Conditioning Association (NSCA), Certified Strength and Conditioning Specialist (CSCS)

1011

1012

| Table 1B. Details of studies from outside the USA |                                            |                                |                                                        |                          |                    |                                 |                                 |                                                         |                  |                                                                       |                                                   |                                                                       |                                                |
|---------------------------------------------------|--------------------------------------------|--------------------------------|--------------------------------------------------------|--------------------------|--------------------|---------------------------------|---------------------------------|---------------------------------------------------------|------------------|-----------------------------------------------------------------------|---------------------------------------------------|-----------------------------------------------------------------------|------------------------------------------------|
| Studies # *                                       | First author                               | Year                           | Included in data extraction (co-authors MSK and MD)    | Study Type               | Study Name         | Country of corresponding author | Setting                         | Program type                                            | Program length   | Mode of exercise training                                             | Patient contact frequency                         | Exercise professional                                                 | Training/ education / credentialing (if noted) |
| 1-4                                               | Auclair; Lemieux-Simard; Pettigrew; Tardif | 2020; 2021; 2019; 2020         | Auclair – X<br>LS – NO<br>Pettigrew - NO<br>Tardif - X | RCT                      | ACTIVE             | Canada                          | University hospital             | Supervised exercise training                            | 12 weeks         | Aerobic exercise, strength training                                   | 3x/ week                                          | Clinical Exercise Specialist (CES)                                    | ACSM                                           |
| 5-8                                               | Baillot; Baillot; Baillot; Baillot         | 2013; 2016; 2016; 2018         | X                                                      | Pilot study; RCT         | PreSET; TelePreSET | Canada                          | Hospital; at home               | In-person and virtual semi-supervised exercise training | 12 weeks         | Endurance training, strength training, Aquagym                        | 2-3x /week on site (+ sessions at home if missed) | Doctoral-level kinesiologist                                          | Not specified                                  |
| 9                                                 | Brown                                      | 2016                           | X                                                      | Prospective intervention | None               | Australia                       | University hospital             | Virtual behavioral education                            | 1 year           | Not specified                                                         | 3x/ week                                          | Nurse manager                                                         | Not specified                                  |
| 10                                                | Brun                                       | 2019                           |                                                        | Longitudinal study       | None               | France                          | University hospital             | Supervised exercise training                            | 5 years          | Endurance training                                                    | 3x/ week                                          | Not specified                                                         | Not specified                                  |
| 11                                                | Campanha-Versiani                          | 2017                           | X                                                      | Quasi-experimental       | None               | Brazil                          | University hospital             | Supervised exercise training and unsupervised training  | 36 weeks; 1 year | Weight-bearing exercise, aerobic exercise                             | 2x / week                                         | Not specified                                                         | Not specified                                  |
| 12-13                                             | Castello; Castello-Simões                  | 2011; 2013                     | X                                                      | RCT                      | None               | Brazil                          | University laboratory           | Supervised exercise training                            | 12 weeks         | Aerobic exercise                                                      | 3x / week                                         | Doctoral-level physiotherapist                                        | Not specified                                  |
| 14-18                                             | Dantas; Dantas; Gil; Gil; Murai            | 2018; 2020; 2021A; 2021B; 2019 | Dantas – X<br>Dantas – X<br>Gil – NO<br>Murai – NO     | RCT                      | None               | Brazil                          | University laboratory; hospital | Supervised exercise training                            | 26 weeks         | Aerobic exercise, resistance training                                 | 3x / week                                         | Doctoral-level graduate student in exercise physiology                | Not specified                                  |
| 19                                                | Da Silva                                   | 2015                           | X                                                      | Case report              | None               | Brazil                          | Clinic; laboratory              | Supervised exercise training                            | 26 weeks         | Resistance training exercises, aerobic exercise, flexibility training | 3x/ week                                          | Physical education teacher with specialization in exercise physiology | Doctoral level                                 |
| 20                                                | de Oliveira                                | 2016                           | X                                                      | RCT                      | None               | Brazil                          | University hospital             | Supervised exercise training                            | 30 days          | Customized program of walking, breathing exercises, some resistance   | 2x/ week                                          | Physiotherapist                                                       | Not specified                                  |



|       |                  |            |   |             |      |                |                              |                                                                                        |          |                                                                                                                           |                                                                          |                                                                                      |                                                                                             |
|-------|------------------|------------|---|-------------|------|----------------|------------------------------|----------------------------------------------------------------------------------------|----------|---------------------------------------------------------------------------------------------------------------------------|--------------------------------------------------------------------------|--------------------------------------------------------------------------------------|---------------------------------------------------------------------------------------------|
|       |                  |            |   |             |      |                |                              |                                                                                        |          | exercises (1kg), and stretching                                                                                           |                                                                          |                                                                                      |                                                                                             |
| 21-22 | Egberts; Egberts | 2010; 2011 | X | RCT         | None | Australia      | University hospital          | Supervised exercise training                                                           | 12 weeks | Not specified                                                                                                             | Not specified                                                            | Certified Personal Trainer (CPT)                                                     | Not specified                                                                               |
| 23    | González-Cutre   | 2019       | X | Qualitative | None | Spain          | University laboratory        | Motivational physical activity program                                                 | 26 weeks | Endurance training, resistance training with machines, games, directed activities, dance, body expression, core-training  | 2x/ week (Months 1 & 2); 3/ week (Months 3 & 4); 4x/ week (Months 5 & 6) | Sports science professional instructors                                              | Master's degree                                                                             |
| 24    | Hanvold          | 2019       | X | RCT         | None | Norway         | University hospital          | Group-based lifestyle intervention with supervised exercise training                   | 2 years  | Measurements of body weight, lecture on given topic, group work and/or assignment, 30-minute supervised physical activity | 16 group meetings over 2 years                                           | Clinical dietitians                                                                  | PhD and masters' students                                                                   |
| 25    | Hassannejad      | 2017       | X | RCT         | None | Iran           | University laboratory        | Unsupervised exercise training                                                         | 12 weeks | Walking, resistance training                                                                                              | 3-5x/ week (Weeks 5-12)                                                  | No supervision                                                                       | Sports medicine specialist                                                                  |
| 26    | Herrera          | 2020       |   | RCT         | None | Chile          | Public hospital              | Supervised exercise training                                                           | 16 weeks | Moderate-intensity continuous training (MICT), high-intensity interval training (HIIT)                                    | 2x/ week                                                                 | Physical therapist                                                                   | Not specified                                                                               |
| 27    | Herring          | 2017       | X | RCT         | None | United Kingdom | University hospital; at home | Supervised exercise training                                                           | 12 weeks | Aerobic exercise, resistance training                                                                                     | 3x/ week                                                                 | Exercise and sports science professional/ REPS Gym instructor/ exercise physiologist | PhD physical activity, lifestyle and bariatric surgery; MSc clinical exercise science; REPS |
| 28    | Jassil           | 2015       | X | Pilot study | None | United Kingdom | University hospital; at home | Supervised exercise training; lifestyle education; nutritional/behavioral intervention | 8 weeks  | Circuit training                                                                                                          | Weekly; 5x/ week                                                         | Physiotherapist, Exercise specialist                                                 | Not specified                                                                               |

|       |                                                    |                              |                       |                               |            |           |                                            |                                                         |                    |                                                                                                                           |                                                                                 |                                                          |                                                                                          |
|-------|----------------------------------------------------|------------------------------|-----------------------|-------------------------------|------------|-----------|--------------------------------------------|---------------------------------------------------------|--------------------|---------------------------------------------------------------------------------------------------------------------------|---------------------------------------------------------------------------------|----------------------------------------------------------|------------------------------------------------------------------------------------------|
| 29    | Jiménez-Loaisa                                     | 2020                         | X                     | Quasi-experimental            | None       | Spain     | University public fitness center           | Motivational physical activity intervention (MPAI)      | 26 weeks           | Aerobic exercise, resistance training with machines, body expression, dance, directed activities, swimming, core training | 2x/ week (Months 1 & 2); 3x/ week (Months 3 & 4); 4x/ week (Months 5 & 6)       | Exercise and sport science professionals                 | Degree in sports science; master's degree in physical activity and health                |
| 30-31 | Marc-Hernández ; Marc-Hernández                    | 2019; 2020                   | 2019 – X<br>2020 – NO | Prospective intervention; RCT | EFIBAR RCT | Spain     | University laboratory; university hospital | Supervised exercise training                            | 12 weeks; 20 weeks | Endurance training, resistance training, HIIT training, flexibility training                                              | 3x/ week; 2x/ week (Weeks 1-4); 3x/ week (Weeks 5-8); 4x/ week (Weeks 9-16)     | Supervised by undergraduate students in exercise science | PhD in exercise science created the program; not certified by major credentialing bodies |
| 32    | Marchesi                                           | 2015                         | X                     | Prospective intervention      | None       | Italy     | University hospital                        | Supervised and unsupervised exercise training           | 43 weeks           | Indoor or outdoor road running                                                                                            | 3x/ week                                                                        | Sports physician (MD), CPT                               | Not specified                                                                            |
| 33-34 | Marcon; Marcon                                     | 2011; 2017                   | X                     | Case series; RCT              | PESO III   | Brazil    | University; hospital                       | Supervised and unsupervised exercise training           | 26 weeks; 16 weeks | Aerobic exercise, walking, stretching                                                                                     | 1x/ week; 2x/ week                                                              | PhD researcher/physical education teacher                | Masters/PhD level                                                                        |
| 35    | Morana                                             | 2018                         | X                     | Pilot study                   | None       | France    | Physical therapy clinic                    | Supervised exercise training; functional rehabilitation | 10 weeks           | Endurance training, rowing, core exercises, proprioception work, coordination                                             | 2x/ week                                                                        | Physiotherapist                                          | Not specified                                                                            |
| 36-40 | Mundbjerg; Mundbjerg; Stolberg; Stolberg; Stolberg | 2018; 2018; 2018; 2018; 2018 | X                     | RCT                           | None       | Denmark   | Public fitness center                      | Supervised exercise training                            | 26 weeks           | Endurance training, resistance training                                                                                   | 2x/ week                                                                        | Physiotherapist                                          | Not specified                                                                            |
| 41    | Muschitz                                           | 2015                         | X                     | RCT                           | BABS       | Austria   | University hospital                        | Unsupervised exercise training with diary monitoring    | 2 years            | Nordic walking, strength perseverance, equipment training                                                                 | 3x/ week (Nordic walking), 2x/ week (strength perseverance, equipment training) | Physical medicine expert                                 | Not specified                                                                            |
| 42    | Ng                                                 | 2015                         | X                     | Prospective intervention      | LIFE       | Singapore | Hospital                                   | Semi-supervised exercise training                       | 12 weeks           | Not specified                                                                                                             | Monthly                                                                         | PhD physiotherapist/exercise physiologist,               | All with bachelors degree (or                                                            |

|    |                   |      |   |                          |         |           |                           |                                               |                 |                                                                              |                                                               |                                                                         |                                                                                                   |
|----|-------------------|------|---|--------------------------|---------|-----------|---------------------------|-----------------------------------------------|-----------------|------------------------------------------------------------------------------|---------------------------------------------------------------|-------------------------------------------------------------------------|---------------------------------------------------------------------------------------------------|
|    |                   |      |   |                          |         |           |                           |                                               |                 |                                                                              |                                                               | masters-level physiotherapist/exercise physiologist, therapy assistants | higher) in physiotherapy. 3 with Masters. 1 with PhD.                                             |
| 43 | Onofre            | 2017 | X | Pilot study              | None    | Brazil    | University laboratory     | Supervised exercise training                  | 12 weeks        | Aerobic exercise, resistance training, stretching                            | 3x/ week                                                      | Physiotherapist                                                         | Trained in cardiac and metabolic rehabilitation                                                   |
| 43 | Picó-Sirvent      | 2019 | X | Pilot study              | None    | Spain     | University laboratory     | Supervised exercise training                  | 26 weeks        | Aerobic exercise, resistance training, HIIT training                         | 2x/ week (Month 1), 3x/ week (Month 2), 4x/ week (Months 3-6) | Supervised undergraduate students in exercise science                   | Not specified                                                                                     |
| 44 | Proulx            | 2018 | X | Prospective intervention | None    | Canada    | University fitness center | Supervised exercise training                  | 12 weeks        | Aerobic exercise, resistance training                                        | 3x/ week                                                      | Certified clinical exercise specialist                                  | Not specified                                                                                     |
| 46 | Ricci             | 2020 | X | RCT                      | None    | Brazil    | University laboratory     | Supervised exercise training                  | 6 weeks         | Whole-body electromyostimulation, dynamic exercise                           | 5x/ week                                                      | Physiotherapist                                                         | Not specified                                                                                     |
| 47 | Rojhani-Shirazi   | 2016 | X | RCT                      | None    | Iran      | University laboratory     | Supervised exercise training                  | 4 weeks         | Balance training                                                             | 4x/ week                                                      | Physical therapist                                                      | Master's degree                                                                                   |
| 48 | Rothwell          | 2015 | X | Retrospective review     | BandFit | Australia | Private hospital, at home | Supervised and unsupervised exercise training | 1 year; 3 years | "BandFit", a personal trainer-led education and participant exercise program | Variable (0, 1, or more than 1 sessions)                      | CPT                                                                     | Not specified                                                                                     |
| 49 | Stegen            | 2011 | X | Pilot study              | None    | Belgium   | University hospital       | Supervised exercise training                  | 12 weeks        | Endurance training, resistance training                                      | 3x/ week                                                      | Movement and rehabilitation expert                                      | Master's degree                                                                                   |
| 50 | Soriano-Maldonado | 2020 | X | RCT                      | EMOVAR  | Spain     | University fitness center | Supervised exercise training                  | 16 weeks        | Aerobic exercise, resistance training                                        | 3x/ week                                                      | CPT                                                                     | Grade in physical activity and sports sciences, and either a master's degree in personal training |

|                                                                                  |                        |            |                       |     |        |        |                           |                              |          |                                       |          |                        |                                               |
|----------------------------------------------------------------------------------|------------------------|------------|-----------------------|-----|--------|--------|---------------------------|------------------------------|----------|---------------------------------------|----------|------------------------|-----------------------------------------------|
|                                                                                  |                        |            |                       |     |        |        |                           |                              |          |                                       |          |                        | or >2 years' experience training obese people |
| 51-52                                                                            | Villa-González; Artero | 2019; 2021 | VG – X<br>Artero – NO | RCT | EFIBAR | Spain  | University fitness center | Supervised exercise training | 16 weeks | Aerobic exercise, resistance training | 3x/ week | CPT                    | Bachelor's degree                             |
| 53                                                                               | Wiklund                | 2015       | X                     | RCT | None   | Sweden | University hospital       | Supervised exercise training | 1 week   | Walking with step counter             | Daily    | Nurse, Physiotherapist | Not specified                                 |
| * Various trials/studies resulted in multiple publications, which were combined. |                        |            |                       |     |        |        |                           |                              |          |                                       |          |                        |                                               |

| <b>Rater #</b>              | <b>1</b>  | <b>2</b>  | <b>3</b>  | <b>4</b>  | <b>5</b>   | <b>6</b>  | <b>7</b>  | <b>8</b>  | <b>9</b>  | <b>10</b> | <b>Average</b> |
|-----------------------------|-----------|-----------|-----------|-----------|------------|-----------|-----------|-----------|-----------|-----------|----------------|
| <b>Rater initials</b>       | <b>DB</b> | <b>CG</b> | <b>EB</b> | <b>BG</b> | <b>MSK</b> | <b>LR</b> | <b>JH</b> | <b>LH</b> | <b>RM</b> | <b>MD</b> |                |
| <b>Bins completed (#)</b>   | 12        | 14        | 10        | 11        | 14         | 11        | 10        | 11        | 10        | 15        | 11.8           |
| <b>Bins w/ 8 items</b>      | 0         | 1         | 1         | 0         | 0          | 0         | 1         | 0         | 0         | 0         | 0.3            |
| <b>Bins w/ 7 items</b>      | 0         | 1         | 1         | 0         | 0          | 0         | 1         | 0         | 0         | 0         | 0.3            |
| <b>Bins w/ 6 items</b>      | 0         | 0         | 0         | 1         | 0          | 3         | 1         | 3         | 2         | 1         | 1.1            |
| <b>Bins w/ 5 items</b>      | 5         | 0         | 1         | 2         | 1          | 0         | 1         | 2         | 3         | 1         | 1.6            |
| <b>Bins w/ 4 items</b>      | 1         | 1         | 2         | 2         | 2          | 2         | 1         | 0         | 2         | 4         | 1.7            |
| <b>Bins w/ 3 items</b>      | 3         | 5         | 3         | 1         | 5          | 4         | 2         | 2         | 2         | 1         | 2.8            |
| <b>Bins w/ 2 items</b>      | 1         | 3         | 2         | 2         | 4          | 0         | 1         | 3         | 1         | 5         | 2.2            |
| <b>Bins w/ 1 items</b>      | 2         | 3         | 0         | 3         | 1          | 2         | 2         | 1         | 0         | 3         | 1.7            |
| <b>Items to discard</b>     | 0         | 0         | 2         | 7         | 3          | 2         | 2         | 2         | 0         | 0         | 1.8            |
| <b>Ave items/bin*</b>       | 3.5       | 3.1       | 4.1       | 3.3       | 2.9        | 3.7       | 4.1       | 3.7       | 4.3       | 2.9       | 3.6            |
| <b>Items missing to add</b> | 0         | 14        | 0         | 7         | 0          | 5         | 6         | 0         | 2         | 0         | 3.4            |
|                             |           |           |           |           |            |           |           |           |           |           |                |

\* ([# items – discarded items]/bins completed)

1014

1015

| Super higher order task theme (SHOT) # | Super higher order task theme (SHOT)             | SHOT Description / Interpretation                                                                                                                                                                                                                                                                                                                                               | Higher order task theme (HOT) #     | Higher order task theme (HOT)        | Lower Order Task Theme (LOT) # | Lower Order Task Theme (LOT)                                  |                                                                                                                                                                                                                                                                                                                                                                               |   |                                                                              |                                                                                                                                                                                                                                                                                                                                                                                                                           |                              |
|----------------------------------------|--------------------------------------------------|---------------------------------------------------------------------------------------------------------------------------------------------------------------------------------------------------------------------------------------------------------------------------------------------------------------------------------------------------------------------------------|-------------------------------------|--------------------------------------|--------------------------------|---------------------------------------------------------------|-------------------------------------------------------------------------------------------------------------------------------------------------------------------------------------------------------------------------------------------------------------------------------------------------------------------------------------------------------------------------------|---|------------------------------------------------------------------------------|---------------------------------------------------------------------------------------------------------------------------------------------------------------------------------------------------------------------------------------------------------------------------------------------------------------------------------------------------------------------------------------------------------------------------|------------------------------|
| 1                                      | Exercise-related health assessment               | Perform pre-participation screening, and identify comorbidities. Conduct baseline assessments of vitals. Utilize established and valid protocols to determine aerobic fitness and cardiac risk. Interpret data and track progress.                                                                                                                                              | 1                                   | Risk factor and needs identification | 1                              | Risk factor identification                                    |                                                                                                                                                                                                                                                                                                                                                                               |   |                                                                              |                                                                                                                                                                                                                                                                                                                                                                                                                           |                              |
|                                        |                                                  |                                                                                                                                                                                                                                                                                                                                                                                 | 2                                   | Exercise-related health assessment   | 2                              | Needs assessment                                              |                                                                                                                                                                                                                                                                                                                                                                               |   |                                                                              |                                                                                                                                                                                                                                                                                                                                                                                                                           |                              |
|                                        |                                                  |                                                                                                                                                                                                                                                                                                                                                                                 |                                     |                                      | 3                              | Stress testing                                                |                                                                                                                                                                                                                                                                                                                                                                               |   |                                                                              |                                                                                                                                                                                                                                                                                                                                                                                                                           |                              |
|                                        |                                                  |                                                                                                                                                                                                                                                                                                                                                                                 |                                     |                                      | 4                              | Vitals                                                        |                                                                                                                                                                                                                                                                                                                                                                               |   |                                                                              |                                                                                                                                                                                                                                                                                                                                                                                                                           |                              |
|                                        |                                                  |                                                                                                                                                                                                                                                                                                                                                                                 |                                     |                                      | 5                              | ECG & other cardiopulmonary assessments                       |                                                                                                                                                                                                                                                                                                                                                                               |   |                                                                              |                                                                                                                                                                                                                                                                                                                                                                                                                           |                              |
| 2                                      | Body composition and physical fitness assessment | Assess fat and lean mass. Evaluate muscular strength, endurance & power, balance, and other indicators of physical fitness and function. Interpret data to utilize for prescription and as indicators of program effectiveness.                                                                                                                                                 | 3                                   | Body composition assessment          | 6                              | Body composition testing                                      |                                                                                                                                                                                                                                                                                                                                                                               |   |                                                                              |                                                                                                                                                                                                                                                                                                                                                                                                                           |                              |
|                                        |                                                  |                                                                                                                                                                                                                                                                                                                                                                                 | 4                                   | Fitness testing                      | 7                              | Anthropometry                                                 |                                                                                                                                                                                                                                                                                                                                                                               |   |                                                                              |                                                                                                                                                                                                                                                                                                                                                                                                                           |                              |
|                                        |                                                  |                                                                                                                                                                                                                                                                                                                                                                                 |                                     |                                      | 8                              | Fitness testing                                               |                                                                                                                                                                                                                                                                                                                                                                               |   |                                                                              |                                                                                                                                                                                                                                                                                                                                                                                                                           |                              |
|                                        |                                                  |                                                                                                                                                                                                                                                                                                                                                                                 |                                     |                                      | 9                              | Balance testing                                               |                                                                                                                                                                                                                                                                                                                                                                               |   |                                                                              |                                                                                                                                                                                                                                                                                                                                                                                                                           |                              |
|                                        |                                                  |                                                                                                                                                                                                                                                                                                                                                                                 |                                     |                                      | 10                             | Strength testing                                              |                                                                                                                                                                                                                                                                                                                                                                               |   |                                                                              |                                                                                                                                                                                                                                                                                                                                                                                                                           |                              |
|                                        |                                                  |                                                                                                                                                                                                                                                                                                                                                                                 |                                     |                                      | 11                             | Physical function testing                                     |                                                                                                                                                                                                                                                                                                                                                                               |   |                                                                              |                                                                                                                                                                                                                                                                                                                                                                                                                           |                              |
|                                        |                                                  |                                                                                                                                                                                                                                                                                                                                                                                 |                                     |                                      | 12                             | PA/Sedentary assessment                                       |                                                                                                                                                                                                                                                                                                                                                                               |   |                                                                              |                                                                                                                                                                                                                                                                                                                                                                                                                           |                              |
|                                        |                                                  |                                                                                                                                                                                                                                                                                                                                                                                 |                                     |                                      | 13                             | PA/Sedentary monitoring                                       |                                                                                                                                                                                                                                                                                                                                                                               |   |                                                                              |                                                                                                                                                                                                                                                                                                                                                                                                                           |                              |
|                                        |                                                  |                                                                                                                                                                                                                                                                                                                                                                                 |                                     |                                      | 14                             | Accelerometry                                                 |                                                                                                                                                                                                                                                                                                                                                                               |   |                                                                              |                                                                                                                                                                                                                                                                                                                                                                                                                           |                              |
|                                        |                                                  |                                                                                                                                                                                                                                                                                                                                                                                 |                                     |                                      | 3                              | Lifestyle physical activity and sedentary behavior assessment | Assess 24-hour, free-living physical activity behavior, including sedentary behavior, light, moderate and vigorous activity. Evaluate for baseline and tracking over time with validated surveys, wearables and/or accelerometry. Measure steps, sitting time and caloric expenditure. Interpret data to utilize for prescription and as indicators of program effectiveness. | 5 | Lifestyle physical activity and sedentary behavior assessment (same as SHOT) | 15                                                                                                                                                                                                                                                                                                                                                                                                                        | Fitness and Health Education |
|                                        |                                                  |                                                                                                                                                                                                                                                                                                                                                                                 |                                     |                                      |                                |                                                               |                                                                                                                                                                                                                                                                                                                                                                               | 4 | Education, instruction, and prescription                                     | Promote literacy of fitness and its effect on health. Educate patients in principles of enhancing physical activity and reducing sedentarism across the entire day. Guide patients in exercise basics (e.g., specificity, overload) to promote fitness and health outcomes in the clinic and independently at home (self-management). Conduct safe, adaptive and individualized programming to ensure continued progress. | 6                            |
| 7                                      | Physical activity instruction                    | 17                                                                                                                                                                                                                                                                                                                                                                              | Exercise training                   |                                      |                                |                                                               |                                                                                                                                                                                                                                                                                                                                                                               |   |                                                                              |                                                                                                                                                                                                                                                                                                                                                                                                                           |                              |
| 8                                      | Exercise prescription                            | 18                                                                                                                                                                                                                                                                                                                                                                              | Exercise instruction                |                                      |                                |                                                               |                                                                                                                                                                                                                                                                                                                                                                               |   |                                                                              |                                                                                                                                                                                                                                                                                                                                                                                                                           |                              |
|                                        |                                                  | 19                                                                                                                                                                                                                                                                                                                                                                              | Prescription-individual (in clinic) |                                      |                                |                                                               |                                                                                                                                                                                                                                                                                                                                                                               |   |                                                                              |                                                                                                                                                                                                                                                                                                                                                                                                                           |                              |
|                                        |                                                  | 20                                                                                                                                                                                                                                                                                                                                                                              | Prescription-home (free living)     |                                      |                                |                                                               |                                                                                                                                                                                                                                                                                                                                                                               |   |                                                                              |                                                                                                                                                                                                                                                                                                                                                                                                                           |                              |
| 9                                      | Personalization                                  | Supervise group and/or individual exercise training. Monitor hemodynamic and metabolic responses, signs and symptoms with both subjective/self-report and objective (both active and passive) instruments, including wearables, CGM and other digital assessments.                                                                                                              | 21                                  | Prescription-group (in clinic)       | 21                             | Modification                                                  |                                                                                                                                                                                                                                                                                                                                                                               |   |                                                                              |                                                                                                                                                                                                                                                                                                                                                                                                                           |                              |
|                                        |                                                  |                                                                                                                                                                                                                                                                                                                                                                                 | 22                                  | Modification                         |                                |                                                               |                                                                                                                                                                                                                                                                                                                                                                               |   |                                                                              |                                                                                                                                                                                                                                                                                                                                                                                                                           |                              |
|                                        |                                                  |                                                                                                                                                                                                                                                                                                                                                                                 | 23                                  | Individualization                    |                                |                                                               |                                                                                                                                                                                                                                                                                                                                                                               |   |                                                                              |                                                                                                                                                                                                                                                                                                                                                                                                                           |                              |
|                                        |                                                  |                                                                                                                                                                                                                                                                                                                                                                                 | 24                                  | Progression                          |                                |                                                               |                                                                                                                                                                                                                                                                                                                                                                               |   |                                                                              |                                                                                                                                                                                                                                                                                                                                                                                                                           |                              |
|                                        |                                                  |                                                                                                                                                                                                                                                                                                                                                                                 | 25                                  | Adjustments                          |                                |                                                               |                                                                                                                                                                                                                                                                                                                                                                               |   |                                                                              |                                                                                                                                                                                                                                                                                                                                                                                                                           |                              |
|                                        |                                                  |                                                                                                                                                                                                                                                                                                                                                                                 | 26                                  | Metabolic testing                    |                                |                                                               |                                                                                                                                                                                                                                                                                                                                                                               |   |                                                                              |                                                                                                                                                                                                                                                                                                                                                                                                                           |                              |
| 5                                      | Exercise monitoring                              | Supervise group and/or individual exercise training. Monitor hemodynamic and metabolic responses, signs and symptoms with both subjective/self-report and objective (both active and passive) instruments, including wearables, CGM and other digital assessments.                                                                                                              | 10                                  | Metabolic assessment                 | 27                             | Glucose testing (clinic / lab)                                |                                                                                                                                                                                                                                                                                                                                                                               |   |                                                                              |                                                                                                                                                                                                                                                                                                                                                                                                                           |                              |
|                                        |                                                  |                                                                                                                                                                                                                                                                                                                                                                                 | 11                                  | Monitoring                           | 28                             | Glucose monitoring (peri-exercise)                            |                                                                                                                                                                                                                                                                                                                                                                               |   |                                                                              |                                                                                                                                                                                                                                                                                                                                                                                                                           |                              |
|                                        |                                                  |                                                                                                                                                                                                                                                                                                                                                                                 |                                     |                                      | 29                             | Symptom monitoring                                            |                                                                                                                                                                                                                                                                                                                                                                               |   |                                                                              |                                                                                                                                                                                                                                                                                                                                                                                                                           |                              |
|                                        |                                                  |                                                                                                                                                                                                                                                                                                                                                                                 |                                     |                                      | 30                             | HR monitoring                                                 |                                                                                                                                                                                                                                                                                                                                                                               |   |                                                                              |                                                                                                                                                                                                                                                                                                                                                                                                                           |                              |
|                                        |                                                  |                                                                                                                                                                                                                                                                                                                                                                                 |                                     |                                      | 31                             | Supervision (group)                                           |                                                                                                                                                                                                                                                                                                                                                                               |   |                                                                              |                                                                                                                                                                                                                                                                                                                                                                                                                           |                              |
|                                        |                                                  |                                                                                                                                                                                                                                                                                                                                                                                 |                                     |                                      | 32                             | Monitoring (individual)                                       |                                                                                                                                                                                                                                                                                                                                                                               |   |                                                                              |                                                                                                                                                                                                                                                                                                                                                                                                                           |                              |
|                                        |                                                  |                                                                                                                                                                                                                                                                                                                                                                                 |                                     |                                      | 33                             | Exercise monitoring                                           |                                                                                                                                                                                                                                                                                                                                                                               |   |                                                                              |                                                                                                                                                                                                                                                                                                                                                                                                                           |                              |
|                                        |                                                  |                                                                                                                                                                                                                                                                                                                                                                                 |                                     |                                      | 34                             | Effort/Exertion monitoring                                    |                                                                                                                                                                                                                                                                                                                                                                               |   |                                                                              |                                                                                                                                                                                                                                                                                                                                                                                                                           |                              |
|                                        |                                                  |                                                                                                                                                                                                                                                                                                                                                                                 |                                     |                                      | 35                             | PA/sedentary counseling                                       |                                                                                                                                                                                                                                                                                                                                                                               |   |                                                                              |                                                                                                                                                                                                                                                                                                                                                                                                                           |                              |
|                                        |                                                  |                                                                                                                                                                                                                                                                                                                                                                                 |                                     |                                      | 36                             | Motivation & feedback                                         |                                                                                                                                                                                                                                                                                                                                                                               |   |                                                                              |                                                                                                                                                                                                                                                                                                                                                                                                                           |                              |
| 6                                      | Behavioral counseling and psychosocial support   | Promote physical activity with basics of behavior change, such as goal setting, social support, and reinforcement, within scope of profession. Demonstrate encouragement and follow up for continued success. Reinforce and support psychosocial recommendations from licensed psychology and social work professionals. Refer to these professionals when indicated/necessary. | 12                                  | Counseling techniques                | 37                             | Goal setting                                                  |                                                                                                                                                                                                                                                                                                                                                                               |   |                                                                              |                                                                                                                                                                                                                                                                                                                                                                                                                           |                              |
|                                        |                                                  |                                                                                                                                                                                                                                                                                                                                                                                 | 13                                  | Psychosocial support                 | 38                             | Exercise prescription adherence                               |                                                                                                                                                                                                                                                                                                                                                                               |   |                                                                              |                                                                                                                                                                                                                                                                                                                                                                                                                           |                              |
|                                        |                                                  |                                                                                                                                                                                                                                                                                                                                                                                 |                                     |                                      | 39                             | Support group                                                 |                                                                                                                                                                                                                                                                                                                                                                               |   |                                                                              |                                                                                                                                                                                                                                                                                                                                                                                                                           |                              |
| 7                                      | Dietary support                                  | Reinforce and support dietary recommendations from licensed nutrition professionals. Support nutrition basics, such as energy balance and exercise-related nutrient monitoring, within scope of profession. Refer to nutrition professionals when indicated/necessary.                                                                                                          | 14                                  | Dietary support (same as SHOT)       | 40                             | Psychosocial assessment                                       |                                                                                                                                                                                                                                                                                                                                                                               |   |                                                                              |                                                                                                                                                                                                                                                                                                                                                                                                                           |                              |
|                                        |                                                  |                                                                                                                                                                                                                                                                                                                                                                                 |                                     |                                      | 41                             | Food monitoring                                               |                                                                                                                                                                                                                                                                                                                                                                               |   |                                                                              |                                                                                                                                                                                                                                                                                                                                                                                                                           |                              |
|                                        |                                                  |                                                                                                                                                                                                                                                                                                                                                                                 |                                     |                                      | 42                             | Food assessment                                               |                                                                                                                                                                                                                                                                                                                                                                               |   |                                                                              |                                                                                                                                                                                                                                                                                                                                                                                                                           |                              |

1016

1017 Table 3. Final model with descriptions for the task Super Higher Order Themes (SHOTs)

**Supplemental Table 1. Criteria for task identification and classification.**

|   | Task Category from Table 2                                     | Does NOT include                                                                                                                                            | Explicit (X symbol)                                                                                                                                                    | Implicit (/ symbol) suggesting strongly that it was conducted                     | Notes and search criteria                                                                                                                                                     |
|---|----------------------------------------------------------------|-------------------------------------------------------------------------------------------------------------------------------------------------------------|------------------------------------------------------------------------------------------------------------------------------------------------------------------------|-----------------------------------------------------------------------------------|-------------------------------------------------------------------------------------------------------------------------------------------------------------------------------|
| 1 | Risk Factor and needs identification                           | Does <b>not</b> include:<br><br>Limitations due to age, weight status and various eligibility factors.<br><br>Signed approval from PCP/surgeon for exercise | 1. Exercise health & musculoskeletal screening,<br>2. determination of contraindications<br>3. Needs identification<br>Includes:<br>PAR-Q,                             | Inclusion/ exclusion criteria suggestive that a clinical screening was conducted. | Search for words: RISK / SCREENING / NEEDS / CONTRAINDICATIONS<br><br>In some studies, no additional exercise-related health screening was conducted (e.g., Parikh; Rothwell) |
| 2 | Exercise-related health assessment                             | Does <b>not</b> include:<br>Functional testing, like 6-minute walk tests                                                                                    | physical by a sports physician<br>Vitals (Blood pressure) – e.g., Funderburk<br>Bruce protocols<br>Modified-Bruce protocols                                            | VO2max data or similar was reported                                               |                                                                                                                                                                               |
| 3 | Body Composition Assessment                                    | Does <b>not</b> include:<br>Does not include simple weight, height and BMI.                                                                                 | Tests of percent body fat and resting metabolic rate and waist and hip circumferences.                                                                                 | Data suggestive of test completion                                                |                                                                                                                                                                               |
| 4 | Fitness testing                                                | Does <b>not</b> include:<br>“Perceived” fitness                                                                                                             | Other non-graded exercise tests, like the 6MWT or the Cooper Test.                                                                                                     | Data suggestive of test completion                                                |                                                                                                                                                                               |
| 5 | Lifestyle physical activity and sedentary behaviors assessment | Does <b>not</b> include:<br>Gym attendance                                                                                                                  | Accelerometry (i.e., Actigraph);<br>Fitness trackers (i.e., Fitbits)<br>Pedometry<br>Diaries / logs of activity                                                        | Step data included                                                                | Search for words: STEPS                                                                                                                                                       |
| 6 | Fitness and Health Education                                   | Does <b>not</b> include:<br>Information about the program                                                                                                   | Structured exercise curriculum<br>Includes “exercise guidelines” as provided in a control group for a RCT.<br>Exercise instructions for home.                          | Evidence of curriculum (e.g., table of contents)                                  |                                                                                                                                                                               |
| 7 | Physical Activity Instruction                                  | Does <b>not</b> include:<br>Structured exercise program                                                                                                     | Includes:<br>Familiarization<br>Dumbbells, resistance bands, bands,                                                                                                    | List of exercises that would infer that patient would need instruction            |                                                                                                                                                                               |
| 8 | Exercise Prescription                                          | Does <b>not</b> include:<br><br>Outside physical activity that a patient would routinely conduct on their own.<br>Exercise counseling about exercise        | Any exercise outside of the structured/supervised training program, as provided by the exercise professional.<br>Includes access to facility during non-training times | Text highly suggestive that a home program was being conducted                    | Search for words: HOME, OUTSIDE                                                                                                                                               |
|   |                                                                |                                                                                                                                                             | Prescribed exercise training program defined by exercise variables, such as:<br>Minutes/time (duration)                                                                | Text highly suggestive that a standardized program was being conducted.           |                                                                                                                                                                               |

|    |                      |                                                                                                                                                         |                                                                                                                                                                                                                                                  |                                                                                                                                                         |                                                                                                                                                                                       |
|----|----------------------|---------------------------------------------------------------------------------------------------------------------------------------------------------|--------------------------------------------------------------------------------------------------------------------------------------------------------------------------------------------------------------------------------------------------|---------------------------------------------------------------------------------------------------------------------------------------------------------|---------------------------------------------------------------------------------------------------------------------------------------------------------------------------------------|
|    |                      | Exercise or PA education                                                                                                                                | Frequency of exercise<br>Type/Mode<br>Etc.<br>Early ambulation program                                                                                                                                                                           |                                                                                                                                                         |                                                                                                                                                                                       |
| 9  | Personalization      | Does <b>not</b> include:<br>General guidelines are given to all/most patients<br><br>Different guidelines/instructions for two or more different groups | Customization, individualization and/or modification based on needs/ health status<br>Modifications based on pain and tolerance<br>Implied if they use heart rate % to prescribe the exercise.<br>"Optimization" of exercise program             | Heart rate zone provision<br><br>If a case study, it is assumed to be individualized for the patient.                                                   | Search for words:<br><br>Individualization, Modification, Customization                                                                                                               |
|    |                      | Does <b>not</b> include:<br>Standardized exercise prescription that does not change over time.                                                          | Weekly, bi-weekly or monthly changes based on a variety of factors, like improvements in fitness or less limitations.                                                                                                                            | Adjustments made but the criteria by which the adjustments are made is not clear, or it is not applicable for all patients (only some were progressed). | Search for words:<br>Progression<br>Increment*                                                                                                                                        |
| 10 | Metabolic Assessment | Does <b>not</b> include:<br>HR <u>prescription</u> only                                                                                                 | Also includes BP and SPO2 and glucose<br>Additional action if parameters are out-of-expected range.                                                                                                                                              | Data suggestive                                                                                                                                         | Search for words:<br>Heart rate<br>Glucose<br>Blood sugar                                                                                                                             |
| 11 | Monitoring           | Does <b>not</b> include:<br>Any activities in which patients were not within sight.                                                                     | Includes orientation and familiarization and training to ensure safety and low abdominal pressure<br>Supervision / Supervised exercise training, including instruction, guiding and feedback<br>Teaching the Borg exertion scale to self-monitor | Text highly suggestive that feedback was being provided.                                                                                                | In many studies, it is not clear if some monitoring was passive or strictly active (i.e., passive monitoring from a desk/station at a gym vs. continuous supervision of each patient. |
| 12 | Counseling Technique | Does <b>not</b> include:<br>Education<br>Passing out guidelines<br>General advice                                                                       | Instructions on goal setting, motivational interviewing or other techniques<br>Contingency planning ("if this happens, do this...")<br>Strategies to build confidence through experiences                                                        | Evidence of strategies (e.g., from a table)                                                                                                             |                                                                                                                                                                                       |
| 13 | Psychosocial Support | Does <b>not</b> include:<br>Therapy<br>Other services necessitating psychiatry licenses                                                                 | Onward Referral<br>Support of Psycho/Social Worker                                                                                                                                                                                               | Tables with psychological data in it in methods or results, information in regards to psychosocial assessments                                          |                                                                                                                                                                                       |
| 14 | Dietary Support      | Does <b>not</b> include:<br>Therapy<br>Other treatments necessitating licensing of dieticians                                                           | Education of basic consulting on bariatric dietary basics per-post surgery, (PPO(?))<br>Supplements, Macros, Importance of vitamins); energy balance<br>Assessment<br>Onward referral                                                            | Lists of information about macronutrients, etc.                                                                                                         |                                                                                                                                                                                       |



1019

Supplemental Table 2a. Patient-care-related tasks completed by the exercise professional for each study: Recode and re-review for 14 higher-order themes (HOTS) within 7 super higher-order themes (SHOTS) <sup>1, 2, 3</sup>

| Citation;<br>(+) primary citation for study series                                | EXERCISE-RELATED HEALTH ASSESSMENT     |                                       | BODY COMPOSITION AND PHYSICAL FITNESS ASSESSMENT |                    | LIFESTYLE PHYSICAL AND SEDENTARY BEHAVIOR ASSESSMENT             | EDUCATION, INSTRUCTION, AND PRESCRIPTION |                                  |                          |                    | EXERCISE MONITORING      |                | BEHAVIORAL COUNSELING AND PSYCHOSOCIAL SUPPORT |                          | DIETARY SUPPORT     |
|-----------------------------------------------------------------------------------|----------------------------------------|---------------------------------------|--------------------------------------------------|--------------------|------------------------------------------------------------------|------------------------------------------|----------------------------------|--------------------------|--------------------|--------------------------|----------------|------------------------------------------------|--------------------------|---------------------|
|                                                                                   | 1- Risk factor or needs identification | 2- Exercise-Related Health Assessment | 3. Body Composition Assessment                   | 4. Fitness Testing | 5. Lifestyle physical activity and sedentary behavior assessment | 6. Exercise and Fitness Education        | 7. Physical Activity Instruction | 8. Exercise Prescription | 9. Personalization | 10. Metabolic Assessment | 11. Monitoring | 12. Counseling Techniques                      | 13. Psychosocial Support | 14. Dietary Support |
| Auclair, 2020<br>Lemieux, 2021<br>Simard, 2019<br>Pettigrew, 2020<br>Tardif, 2020 | X                                      | X                                     | X                                                | X                  |                                                                  |                                          | X                                | X                        |                    | X                        | X              |                                                |                          |                     |
| Berggren, 2008                                                                    | /                                      | X                                     | X                                                | X                  |                                                                  |                                          | X-1:1                            | X-1:1                    |                    | X                        | X              |                                                |                          | X                   |
| Bond, 2015a<br>Bond, 2015 b<br>Bond, 2017                                         | X                                      | X                                     | X                                                | X                  |                                                                  | X-1:1i                                   | X:1-1i                           | X-H                      | X                  |                          | X              | X                                              |                          |                     |
| Carnero, 2017<br>Coen, 2015a<br>Coen, 2015b<br>Lopez, 2017<br>Woodlief, 2015      | X                                      | X                                     | X                                                | X                  | X                                                                |                                          |                                  | X                        | X                  | X                        | X              |                                                |                          |                     |
| Daniels, 2018                                                                     | X                                      | X                                     | X                                                | X                  |                                                                  | X                                        |                                  | X:1                      |                    | X                        | X              | X                                              | X                        |                     |
| Dantas, 2020<br>Dantas, 2018<br>Gil, 2021a<br>Gil, 2021b<br>Murai, 2019           | X                                      | X                                     | X                                                | X                  | X                                                                |                                          |                                  | X                        | X                  | X                        | X              |                                                |                          |                     |
| Gill, 2018<br>Powell, 2018<br>Powell, 2020                                        | X                                      | X                                     | X                                                | X                  | X                                                                | X                                        | X                                | X-G                      |                    |                          | X              | X                                              |                          | X                   |
| Halparin, 2014a                                                                   | X                                      | X                                     | X                                                | /                  | X                                                                | X                                        | /                                | X-G / X-1:1i             | X                  | X                        | X              | X                                              | X                        | X                   |

Supplemental Table 2a. Patient-care-related tasks completed by the exercise professional for each study: Recode and re-review for 14 higher-order themes (HOTS) within 7 super higher-order themes (SHOTS) <sup>1, 2, 3</sup>

| Citation;<br>(+) primary citation for study series | EXERCISE-RELATED HEALTH ASSESSMENT      |                                       | BODY COMPOSITION AND PHYSICAL FITNESS ASSESSMENT |                    | LIFESTYLE PHYSICAL AND SEDENTARY BEHAVIOR ASSESSMENT             | EDUCATION, INSTRUCTION, AND PRESCRIPTION |                                  |                          |                    | EXERCISE MONITORING      |                | BEHAVIORAL COUNSELING AND PSYCHOSOCIAL SUPPORT |                          | DIETARY SUPPORT     |
|----------------------------------------------------|-----------------------------------------|---------------------------------------|--------------------------------------------------|--------------------|------------------------------------------------------------------|------------------------------------------|----------------------------------|--------------------------|--------------------|--------------------------|----------------|------------------------------------------------|--------------------------|---------------------|
|                                                    | 1- Risk factor and needs identification | 2- Exercise-Related Health Assessment | 3. Body Composition Assessment                   | 4. Fitness Testing | 5. Lifestyle physical activity and sedentary behavior assessment | 6. Exercise and Fitness Education        | 7. Physical Activity Instruction | 8. Exercise Prescription | 9. Personalization | 10. Metabolic Assessment | 11. Monitoring | 12. Counseling Techniques                      | 13. Psychosocial Support | 14. Dietary Support |
| Halparin, 2015b<br>Panosian, 2017<br>Hamdy, 2018   |                                         |                                       |                                                  |                    |                                                                  |                                          |                                  |                          |                    |                          |                |                                                |                          |                     |
| Hickey, 1999                                       | X                                       | X                                     | X                                                | X                  | /                                                                | X                                        | /                                | X-1:1i                   |                    | X                        | X              |                                                |                          |                     |
| Huck, 2015                                         | X                                       | X                                     | X                                                | X                  | X                                                                |                                          | X                                | X                        |                    | X                        | X              | X                                              |                          |                     |
| Kelley, 2006                                       | X                                       | X                                     | X                                                | X                  | X                                                                | X                                        | /                                | X                        | X                  | X                        | X              | /                                              |                          | X                   |
| Kerrigan, 2012                                     | X                                       | X                                     | X                                                | X                  | X                                                                | X                                        | /                                | X-1:1i                   | X                  |                          | X              | X                                              |                          | X                   |
| Morana, 2018                                       | X                                       | X                                     | X                                                | X                  | X                                                                |                                          |                                  | X:1-1i                   | X                  | X                        | X              |                                                |                          |                     |
| Shah, 2011                                         | X                                       | X                                     | X                                                | X                  | X                                                                | X                                        |                                  | X / X-1:1i               |                    | X                        | X              | X                                              |                          | X                   |
| Zagarins, 2011                                     | X                                       | X                                     | /                                                | X                  | X                                                                | X                                        | X                                | X-1:1                    | X                  |                          | X              | X                                              |                          | X                   |
|                                                    | 15/15;<br>100%                          | 15/15;<br>100%                        | 15/15;<br>100%                                   | 15/15;<br>100%     | 11/15;<br>73%                                                    | 9/15;<br>60%                             | 11/15;<br>73%                    | 15/15;<br>100%           | 7/15;<br>47%       | 11/15;<br>73%            | 15/15;<br>100% | 9/15;<br>60%                                   | 2/15;<br>13%             | 7/15;<br>47%        |
| Castello, 2011<br>Castello-Simoes, 2013            | X                                       | X                                     | X                                                | X                  | /                                                                |                                          | X                                | X: 1-1i                  | X                  | X                        | X              |                                                |                          |                     |
| de Oliveira, 2016                                  | X                                       | X                                     | X                                                | X                  |                                                                  |                                          | X                                | X:1-1i / X:Hi            |                    |                          | X              | X                                              |                          |                     |
| Herrera, 2020                                      | X                                       | X                                     | X                                                | X                  | X                                                                | X                                        | X                                | X-G                      |                    | X                        | X              |                                                |                          |                     |
| Jassil, 2015                                       | X                                       | /                                     | X                                                | /                  | X                                                                | X                                        |                                  | X                        | X                  | X                        | X              | X                                              |                          | X                   |
| Morana, 2018                                       | X                                       | X                                     | X                                                | X                  | X                                                                |                                          |                                  | X:1-1i                   | X                  | X                        | X              |                                                |                          |                     |
| Mundbjerg, 2018<br>Mundbjerg, 2018                 |                                         |                                       |                                                  |                    |                                                                  |                                          |                                  |                          |                    |                          |                |                                                |                          |                     |
| Stolberg, 2018<br>Stolberg, 2018<br>Stolberg, 2018 | X                                       |                                       | X                                                |                    |                                                                  | X                                        | /                                | X                        | X                  | X                        | X              | X                                              |                          | X                   |
| Onofre, 2017                                       | X                                       | X                                     | X                                                | X                  |                                                                  |                                          |                                  | X                        | X                  | X                        | X              |                                                |                          |                     |
| Rojhani-Shirazi, 2016                              | X                                       | /                                     | X                                                | X                  | X                                                                |                                          |                                  | /                        |                    |                          | X              |                                                |                          |                     |

Supplemental Table 2a. Patient-care-related tasks completed by the exercise professional for each study: Recode and re-review for 14 higher-order themes (HOTS) within 7 super higher-order themes (SHOTS) <sup>1, 2, 3</sup>

| Citation;<br>(+) primary citation for study series               | EXERCISE-RELATED HEALTH ASSESSMENT      |                                       | BODY COMPOSITION AND PHYSICAL FITNESS ASSESSMENT |                    | LIFESTYLE PHYSICAL AND SEDENTARY BEHAVIOR ASSESSMENT             | EDUCATION, INSTRUCTION, AND PRESCRIPTION |                                  |                          |                    | EXERCISE MONITORING      |                | BEHAVIORAL COUNSELING AND PSYCHOSOCIAL SUPPORT |                          | DIETARY SUPPORT     |
|------------------------------------------------------------------|-----------------------------------------|---------------------------------------|--------------------------------------------------|--------------------|------------------------------------------------------------------|------------------------------------------|----------------------------------|--------------------------|--------------------|--------------------------|----------------|------------------------------------------------|--------------------------|---------------------|
|                                                                  | 1- Risk factor and needs identification | 2- Exercise-Related Health Assessment | 3. Body Composition Assessment                   | 4. Fitness Testing | 5. Lifestyle physical activity and sedentary behavior assessment | 6. Exercise and Fitness Education        | 7. Physical Activity Instruction | 8. Exercise Prescription | 9. Personalization | 10. Metabolic Assessment | 11. Monitoring | 12. Counseling Techniques                      | 13. Psychosocial Support | 14. Dietary Support |
| Ricci, 2020                                                      | X                                       | X                                     | X                                                | X                  |                                                                  |                                          | X                                | X                        |                    |                          | X              |                                                |                          |                     |
| Wiklund, 2015                                                    | X                                       | /                                     | X                                                |                    | X                                                                | X                                        | /                                | X                        |                    |                          | X              |                                                |                          |                     |
|                                                                  | 10/10;<br>100%                          | 9/10;<br>90%                          | 10/10;<br>100%                                   | 8/10;<br>80%       | 6/10;<br>60%                                                     | 4/10;<br>40%                             | 5/10;<br>50%                     | 10/10;<br>100%           | 6/10;<br>60%       | 6/10;<br>60%             | 10/10;<br>100% | 3/10;<br>30%                                   | 0/10;<br>0%              | 2/10;<br>20%        |
| Baillet, 2013<br>Baillet, 2016<br>Baillet, 2016<br>Baillet, 2016 | X                                       | X                                     | X                                                | X                  | X                                                                |                                          |                                  | X-G / X-1:1              | X                  | X                        | X              | X                                              |                          | X                   |
| Brandonberg, 2005                                                | X                                       | /                                     | X                                                |                    | X                                                                | /                                        | X                                |                          |                    |                          | X              | X                                              |                          | X                   |
| Brown, 2016                                                      | X                                       |                                       | X                                                |                    |                                                                  |                                          |                                  |                          |                    |                          |                | X                                              |                          | X                   |
| Brun, 2019                                                       | X                                       | X                                     | X                                                | X                  |                                                                  |                                          |                                  | X                        | X                  | X                        |                |                                                |                          |                     |
| Campanha-Versiani 2017                                           | X                                       | /                                     | X                                                | X                  | /                                                                |                                          |                                  | X                        | X                  | X                        | X              |                                                |                          | X                   |
| Coleman, 2016                                                    | X                                       | X                                     | X                                                | X                  |                                                                  |                                          | X                                | X                        |                    |                          | X              |                                                |                          |                     |
| Creel, 2016                                                      | X                                       | X                                     | X                                                | X                  | X                                                                |                                          |                                  | X                        |                    |                          | X              | X                                              |                          | X                   |
| DaSilva, 2015                                                    |                                         |                                       |                                                  |                    |                                                                  |                                          |                                  | X                        |                    |                          |                |                                                |                          |                     |
| Egberts, 2010<br>Egberts, 2011                                   | X                                       |                                       | /                                                |                    |                                                                  |                                          |                                  |                          |                    | X                        | /              |                                                |                          |                     |
| Funderburk, 2010                                                 | X                                       | X                                     |                                                  | X                  | X                                                                |                                          |                                  | X-G                      |                    | X                        |                | X                                              |                          |                     |
| Gilbertson, 2020                                                 | X                                       | X                                     | X                                                | X                  |                                                                  |                                          |                                  | X-H                      |                    | X                        | X              | X                                              |                          | X                   |
| Gonzalez-Cutre, 2020                                             | X                                       |                                       | X                                                |                    | X                                                                |                                          | X                                | X                        |                    |                          | X              | X                                              |                          |                     |
| Hanvold, 2019                                                    | X                                       | X                                     | X                                                |                    | X                                                                |                                          |                                  | X                        | X                  | X                        | X              | X                                              | X                        | X                   |
| Hassannejad, 2017                                                | X                                       | X                                     | X                                                | X                  | X                                                                |                                          | X                                | X                        |                    |                          | X              | X                                              |                          | X                   |
| Herring, 2017                                                    | X                                       | X                                     | X                                                | X                  | X                                                                |                                          | X                                | X-G                      | X                  | X                        | X              | X                                              |                          | X                   |
| Huck, 2015                                                       | X                                       | X                                     | X                                                | X                  | X                                                                |                                          | X                                | X-1:1i                   | X                  | X                        | X              | X                                              |                          | X                   |
| Jimenez-Loasia, 2020                                             | X                                       | X                                     | X                                                | X                  | X                                                                | X                                        | X                                |                          |                    |                          | X              |                                                |                          |                     |

Supplemental Table 2a. Patient-care-related tasks completed by the exercise professional for each study: Recode and re-review for 14 higher-order themes (HOTS) within 7 super higher-order themes (SHOTS) <sup>1, 2, 3</sup>

| Citation;<br>(+) primary citation for study series | EXERCISE-RELATED HEALTH ASSESSMENT      |                                       | BODY COMPOSITION AND PHYSICAL FITNESS ASSESSMENT |                       | LIFESTYLE PHYSICAL AND SEDENTARY BEHAVIOR ASSESSMENT             | EDUCATION, INSTRUCTION, AND PRESCRIPTION |                                  |                          |                       | EXERCISE MONITORING      |                       | BEHAVIORAL COUNSELING AND PSYCHOSOCIAL SUPPORT |                          | DIETARY SUPPORT       |
|----------------------------------------------------|-----------------------------------------|---------------------------------------|--------------------------------------------------|-----------------------|------------------------------------------------------------------|------------------------------------------|----------------------------------|--------------------------|-----------------------|--------------------------|-----------------------|------------------------------------------------|--------------------------|-----------------------|
|                                                    | 1- Risk factor and needs identification | 2- Exercise-Related Health Assessment | 3. Body Composition Assessment                   | 4. Fitness Testing    | 5. Lifestyle physical activity and sedentary behavior assessment | 6. Exercise and Fitness Education        | 7. Physical Activity Instruction | 8. Exercise Prescription | 9. Personalization    | 10. Metabolic Assessment | 11. Monitoring        | 12. Counseling Techniques                      | 13. Psychosocial Support | 14. Dietary Support   |
| Kalarchian, 2013                                   | X                                       | X                                     | X                                                |                       | X                                                                |                                          |                                  | X                        |                       |                          | X                     | X                                              |                          | X                     |
| Klasnja, 2020                                      | X                                       | /                                     | X                                                |                       | /                                                                |                                          |                                  |                          |                       |                          | X                     | X                                              |                          | X                     |
| Marc-Hernandez, 2019                               | X                                       | X                                     | X                                                | X                     | X                                                                | X                                        | X                                | X                        |                       | X                        | X                     |                                                |                          |                       |
| Marc-Hernandez 2020                                |                                         |                                       |                                                  |                       |                                                                  |                                          |                                  |                          |                       |                          |                       |                                                |                          |                       |
| Marchesi, 2015                                     | X                                       | X                                     | X                                                | X                     |                                                                  |                                          | X                                | X                        | X                     | X                        | X                     | X                                              | X                        | X                     |
| Muschitz, 2015                                     | X                                       | X                                     | X                                                |                       |                                                                  | X                                        | X                                | X                        | X                     | X                        | X                     | X                                              |                          | X                     |
| Parikh, 2012                                       | X                                       | X                                     | X                                                |                       | X                                                                | X                                        |                                  | X                        |                       | X                        | X                     | X                                              | X                        | X                     |
| Pico-Sirvent, 2019                                 | X                                       | X                                     | X                                                | X                     |                                                                  |                                          |                                  | X                        | X                     | X                        | X                     |                                                |                          | X                     |
| Proulx, 2018                                       | X                                       |                                       | X                                                |                       | X                                                                |                                          |                                  | X                        | X                     | X                        | X                     | X                                              |                          | X                     |
| Rothwell, 2015                                     | X                                       |                                       | X                                                |                       |                                                                  | X                                        | X                                | X-H                      |                       |                          | X                     |                                                |                          |                       |
| Soriano-Maldonado, 2020                            | X                                       | X                                     | X                                                | X                     | X                                                                |                                          |                                  | X                        |                       | X                        | X                     |                                                |                          | X                     |
| Stegen, 2011                                       | X                                       | X                                     | X                                                | X                     |                                                                  |                                          |                                  | X                        | X                     | X                        | X                     |                                                |                          |                       |
| Villa-González, 2019                               | X                                       |                                       | X                                                |                       |                                                                  |                                          |                                  | X                        | X                     | X                        | X                     | X                                              |                          | X                     |
| Artero, 2021                                       |                                         |                                       |                                                  |                       |                                                                  |                                          |                                  |                          |                       |                          |                       |                                                |                          |                       |
|                                                    | 28/29;<br>97%                           | 22/29;<br>76%                         | 27/29;<br>93%                                    | 16/29;<br>55%         | 17/29;<br>59%                                                    | 6/29;<br>21%                             | 14/29;<br>48%                    | 24/29;<br>83%            | 11/29;<br>38%         | 18/29;<br>62%            | 25/29;<br>86%         | 18/29;<br>62%                                  | 3/29;<br>10%             | 19/29;<br>34%         |
| <b>GRAND TOTAL</b>                                 | <b>53/54;<br/>98%</b>                   | <b>46/54;<br/>85%</b>                 | <b>52/54;<br/>96%</b>                            | <b>39/54;<br/>72%</b> | <b>34/54;<br/>63%</b>                                            | <b>19/54;<br/>35%</b>                    | <b>30/54;<br/>56%</b>            | <b>49/54;<br/>91%</b>    | <b>24/54;<br/>44%</b> | <b>35/54;<br/>65%</b>    | <b>50/54;<br/>93%</b> | <b>30/54;<br/>56%</b>                          | <b>5/54;<br/>9%</b>      | <b>28/54;<br/>44%</b> |

Supplemental Table 2a. Patient-care-related tasks completed by the exercise professional for each study: Recode and re-review for 14 higher-order themes (HOTS) within 7 super higher-order themes (SHOTS) <sup>1, 2, 3</sup>

|                                                                                                                                                                                                   | EXERCISE-RELATED HEALTH ASSESSMENT      |                                       | BODY COMPOSITION AND PHYSICAL FITNESS ASSESSMENT |                    | LIFESTYLE PHYSICAL AND SEDENTARY BEHAVIOR ASSESSMENT             | EDUCATION, INSTRUCTION, AND PRESCRIPTION |                                  |                          |                    | EXERCISE MONITORING      |                | BEHAVIORAL COUNSELING AND PSYCHOSOCIAL SUPPORT |                          | DIETARY SUPPORT     |
|---------------------------------------------------------------------------------------------------------------------------------------------------------------------------------------------------|-----------------------------------------|---------------------------------------|--------------------------------------------------|--------------------|------------------------------------------------------------------|------------------------------------------|----------------------------------|--------------------------|--------------------|--------------------------|----------------|------------------------------------------------|--------------------------|---------------------|
| Citation;<br>(+) primary citation for study series                                                                                                                                                | 1- Risk factor and needs identification | 2- Exercise-Related Health Assessment | 3. Body Composition Assessment                   | 4. Fitness Testing | 5. Lifestyle physical activity and sedentary behavior assessment | 6. Exercise and Fitness Education        | 7. Physical Activity instruction | 8. Exercise Prescription | 9. Personalization | 10. Metabolic Assessment | 11. Monitoring | 12. Counseling Techniques                      | 13. Psychosocial Support | 14. Dietary Support |
| <sup>1:</sup> Hamdy (2018) was not included because it was a review paper.<br><sup>2:</sup> See Table 2b for coding<br><sup>3:</sup> GREEN = EX PHYSIOLOGISTS; PEACH = PHYSIOTHERAPISTS IN PEACH; |                                         |                                       |                                                  |                    |                                                                  |                                          |                                  |                          |                    |                          |                |                                                |                          |                     |

1020

1021

1022

| <b>Supplementary Table 2b: Coding for Table 2a</b> |                                    |                                                                 |                                |                                                                                          |                                   |
|----------------------------------------------------|------------------------------------|-----------------------------------------------------------------|--------------------------------|------------------------------------------------------------------------------------------|-----------------------------------|
|                                                    | X: Explicitly stated<br>/: Implied | Setting                                                         | Standardized vs Individualized | Example format                                                                           | Note                              |
| X-G                                                | Explicitly stated;                 | Group setting                                                   | Standardized, by definition!   | classroom setting; clinic; hospital                                                      |                                   |
| X-1:1                                              | Explicitly stated;                 | 1-on-1 training                                                 | Standardized                   | Exam room at clinic, hospital recovery                                                   |                                   |
| X-1:1i                                             | Explicitly stated;                 | 1-on-1 training                                                 | Individualized                 | Exam room at clinic, hospital recovery                                                   |                                   |
| X-O                                                | Explicitly stated                  | Online (independent- without the exercise professional present) | Standardized                   | Video tutorials                                                                          |                                   |
| X-Oi                                               | Explicitly stated                  | Online                                                          | Individualized                 | Interactive/automated digital systems                                                    | None of the studies may have this |
| X-H                                                | Explicitly stated                  | Home (independent- without the exercise professional present)   | Standardized                   | Ex Rx they are given to do at home, same for everyone (similar to Info Sheet, below)     |                                   |
| X-Hi                                               | Explicitly stated                  | Home (independent- without the exercise professional present)   | Individualized                 | Home Exercise Program (HEP) given at discharge, similar to what physical therapists give |                                   |
| X-T                                                | Explicitly stated                  | telephone or video-conferencing                                 | Standardized                   | Zoom group                                                                               |                                   |
| X-Ti                                               | Explicitly stated                  | telephone or video-conferencing                                 | individualized                 | Zoom one-on-one                                                                          |                                   |
| X-IS                                               | Explicitly stated                  | Info sheet                                                      | Standardized, by definition!   | Just informational, not a program, per se, like above.                                   |                                   |

1023

1024

1025
